# Supplementary material for: Bis(dicarbollide) Complexes of Transition Metals as a Platform for Molecular Switches. Study of Complexation of 8,8′-Bis(methylsulfanyl) Derivatives of Cobalt and Iron Bis(dicarbollides)
Source: MDPI journal article supplement (doi:10.3390/molecules25235745), 2020-12-05

## SUPPORTING INFORMATION

# **Bis(Dicarbollide) Complexes of Transition Metals as a Platform for Molecular Switches. Study of Complexation of 8,8'-Bis(Methylsulfanyl) Derivatives of Cobalt and Iron Bis(Dicarbollides)**

**Sergey A. Anufriev, Sergey V. Timofeev, Alexei A. Anisimov, Kyrill Yu. Suponitsky and Igor B. Sivaev**

|                                                                                                                                                       |    |
|-------------------------------------------------------------------------------------------------------------------------------------------------------|----|
| NMR spectra                                                                                                                                           | 2  |
| <b>Cu(I)</b> complex with 8,8'-(SMe) <sub>2</sub> <b>Cobalt(III)</b> <i>bis</i> (Dicarbollide) (2)                                                    | 2  |
| <b>Ag(I)</b> complex with 8,8'-(SMe) <sub>2</sub> <b>Cobalt(III)</b> <i>bis</i> (Dicarbollide) (3)                                                    | 6  |
| <b>Ag(I)</b> complex with 8,8'-(SMe) <sub>2</sub> <b>Cobalt(III)</b> <i>bis</i> (Dicarbollide) and <b>PPh<sub>3</sub></b> (4)                         | 10 |
| <b>Pd(II)</b> complex with 8,8'-(SMe) <sub>2</sub> <b>Cobalt(III)</b> <i>bis</i> (Dicarbollide), <b>PPh<sub>3</sub></b> and <b>Cl<sup>-</sup></b> (5) | 13 |
| <b>Rh(I)</b> complex with 8,8'-(SMe) <sub>2</sub> <b>Cobalt(III)</b> <i>bis</i> (Dicarbollide) and <b>COD</b> (6)                                     | 16 |
| <b>Rh(I)</b> complex with 8,8'-(SMe) <sub>2</sub> <b>Iron(III)</b> <i>bis</i> (Dicarbollide) and <b>COD</b> (8)                                       | 22 |

<sup>1</sup>H, compound 2

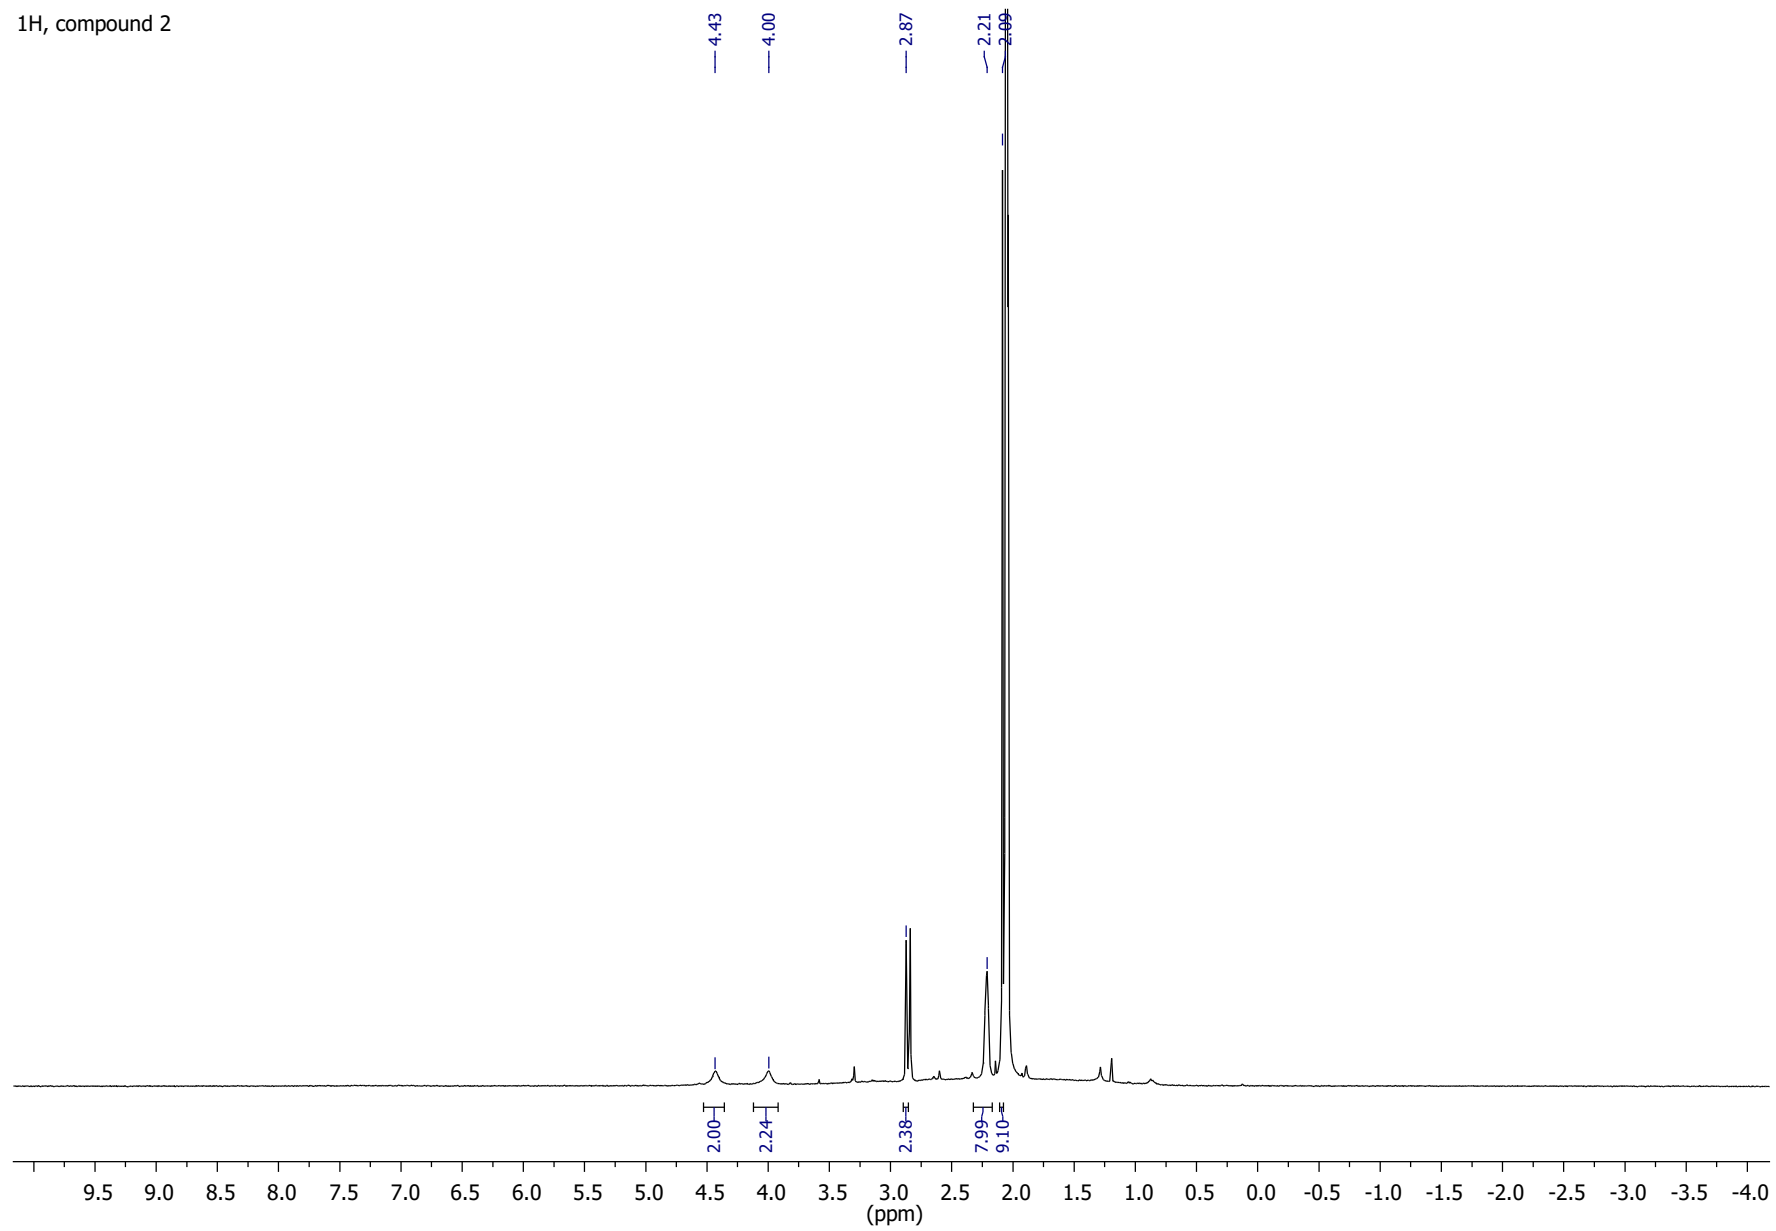

$^{11}\text{B}\{^1\text{H}\}$ , compound 2

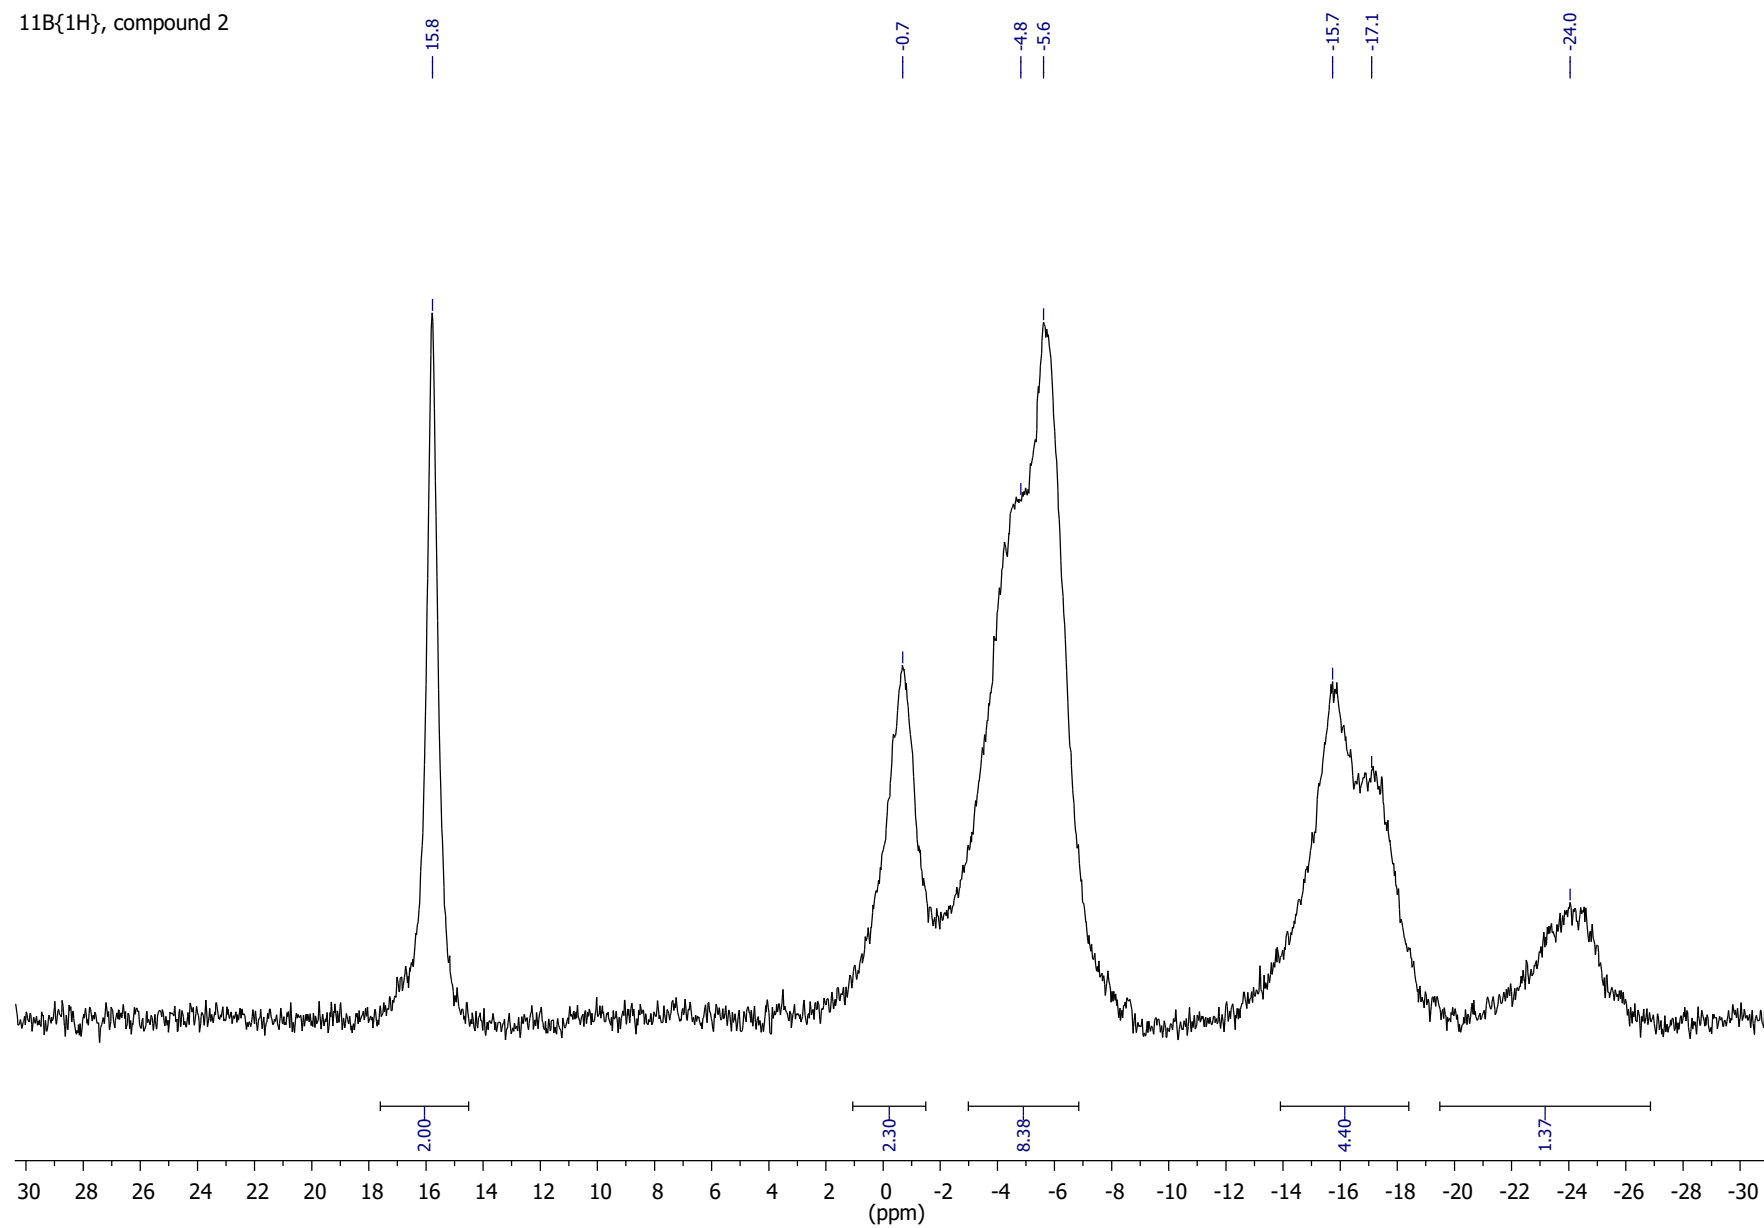

<sup>11</sup>B, compound 2

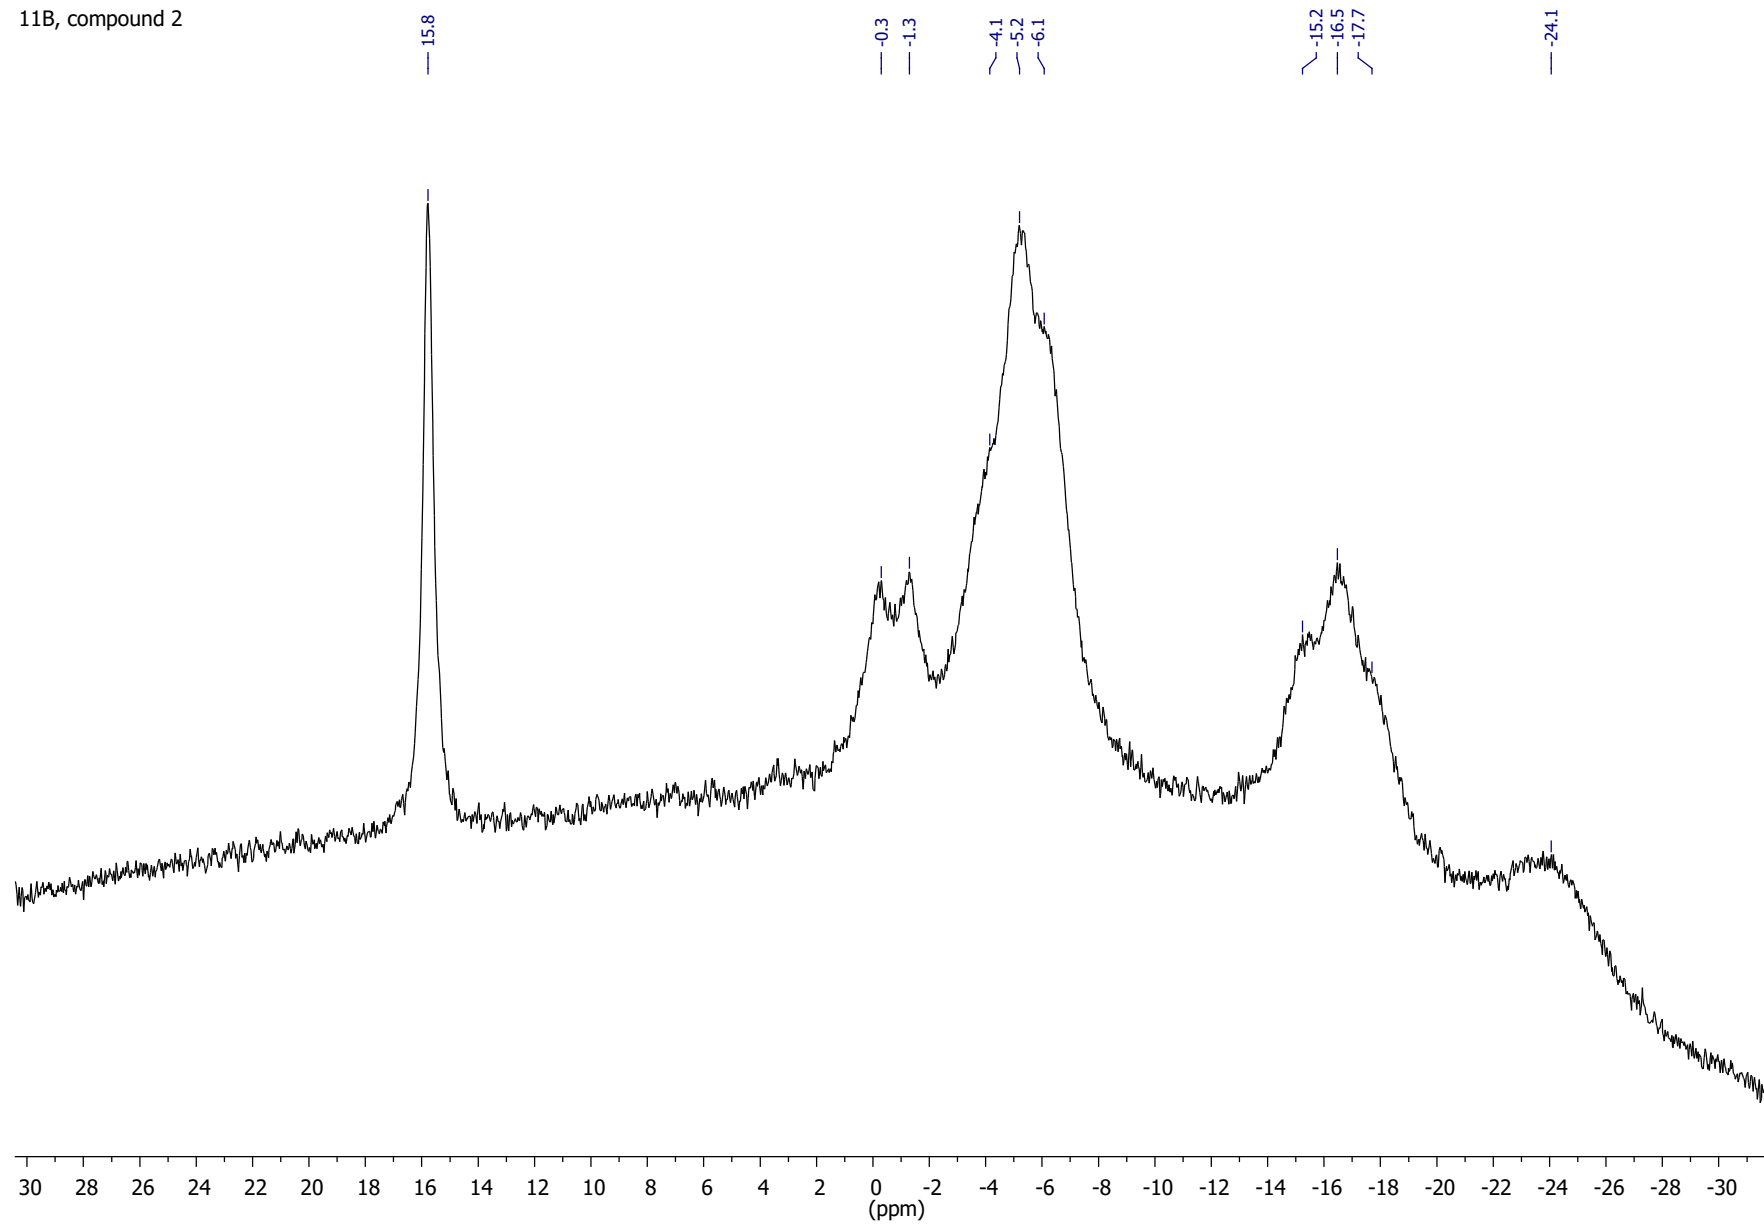

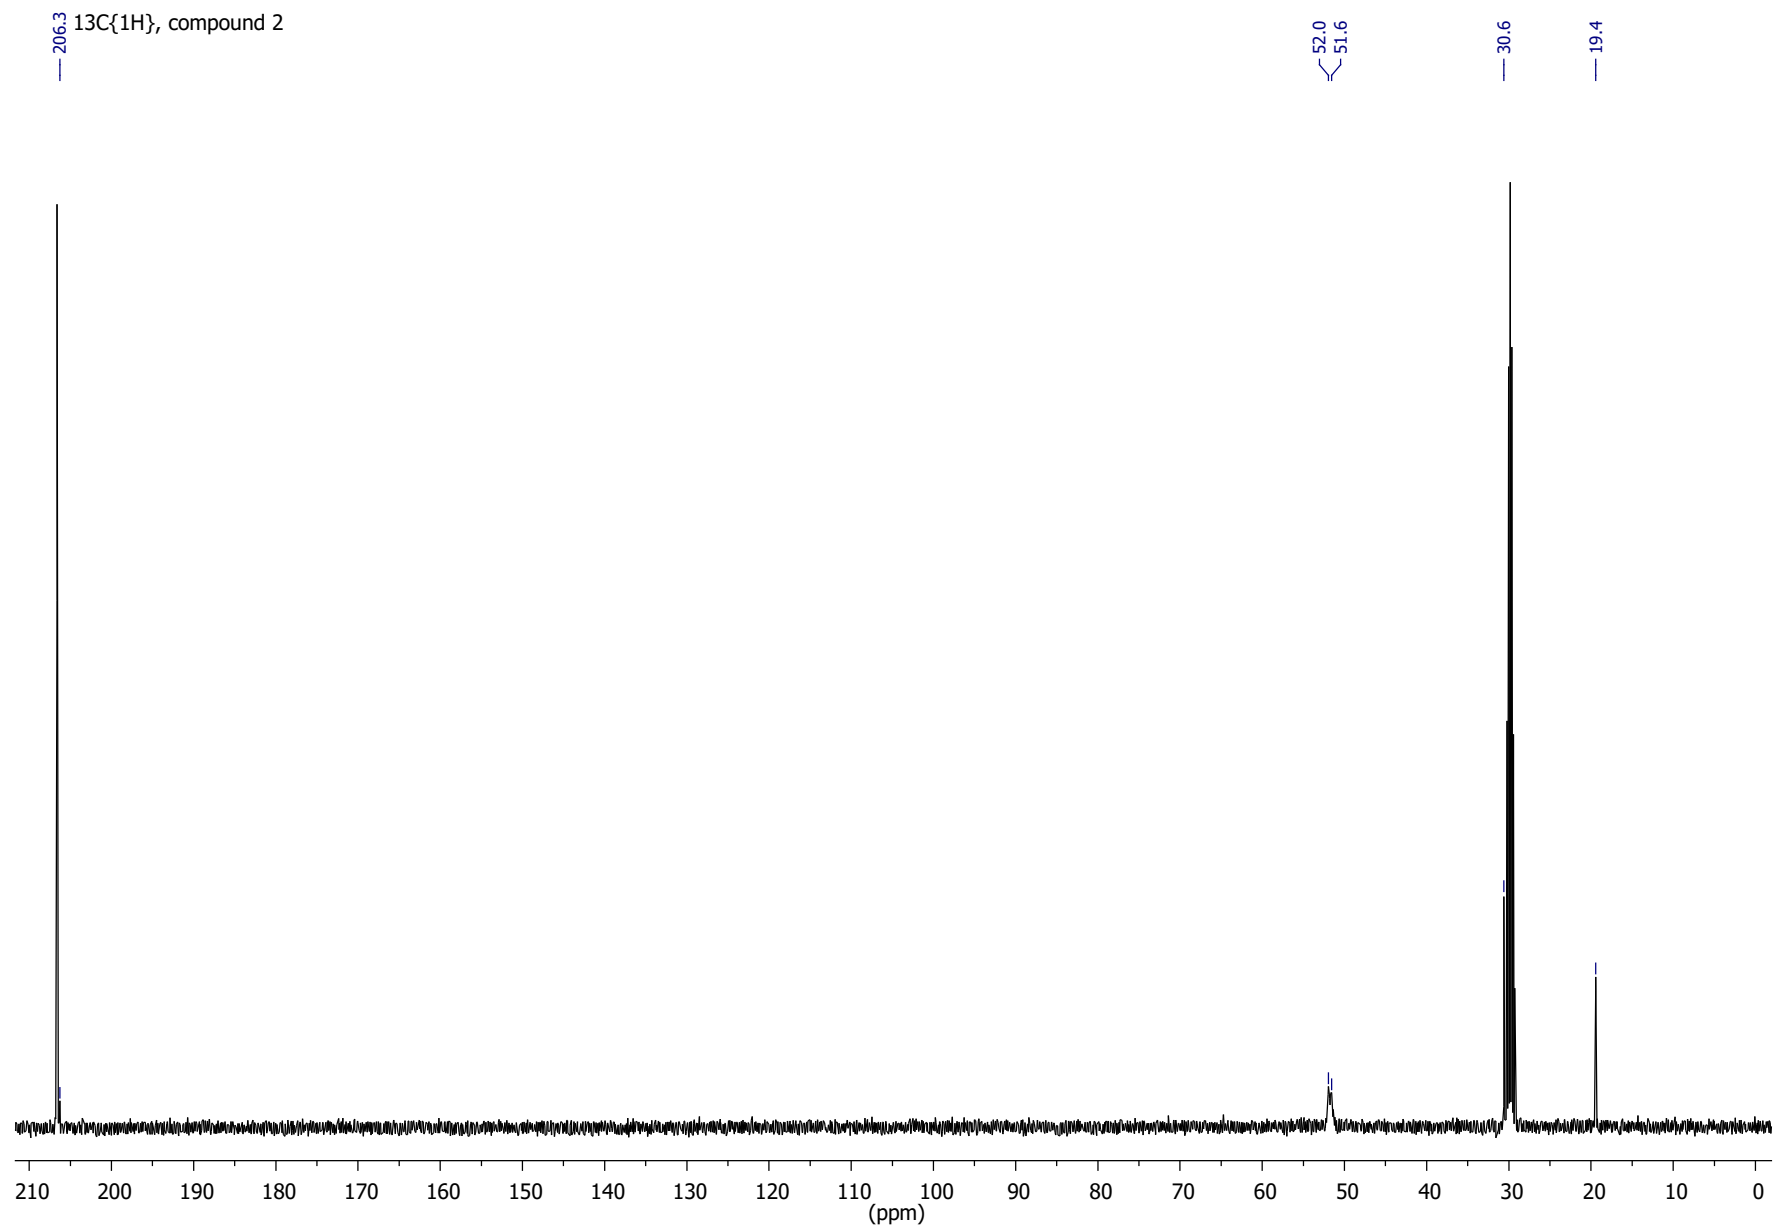

$^1\text{H}$ , compound 3

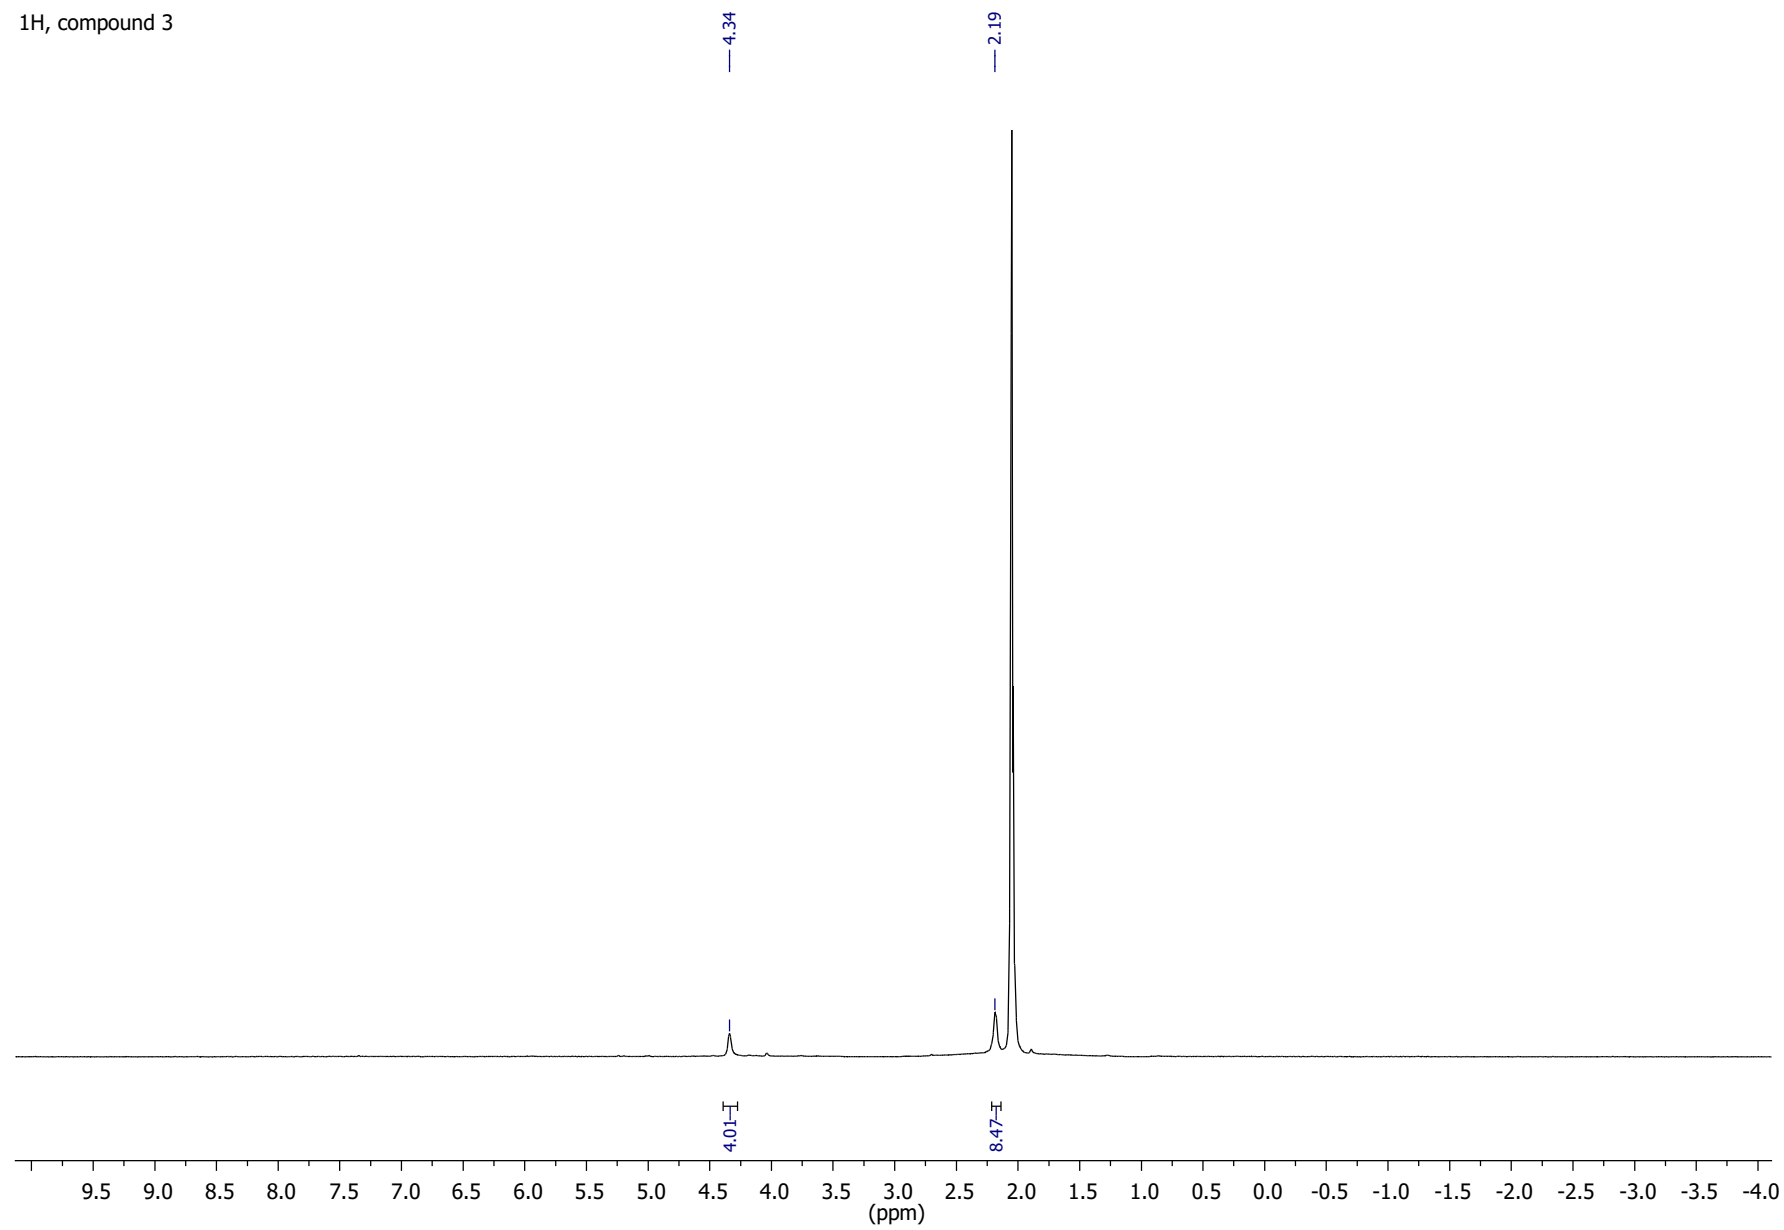

$^{11}\text{B}\{^1\text{H}\}$ , compound 3

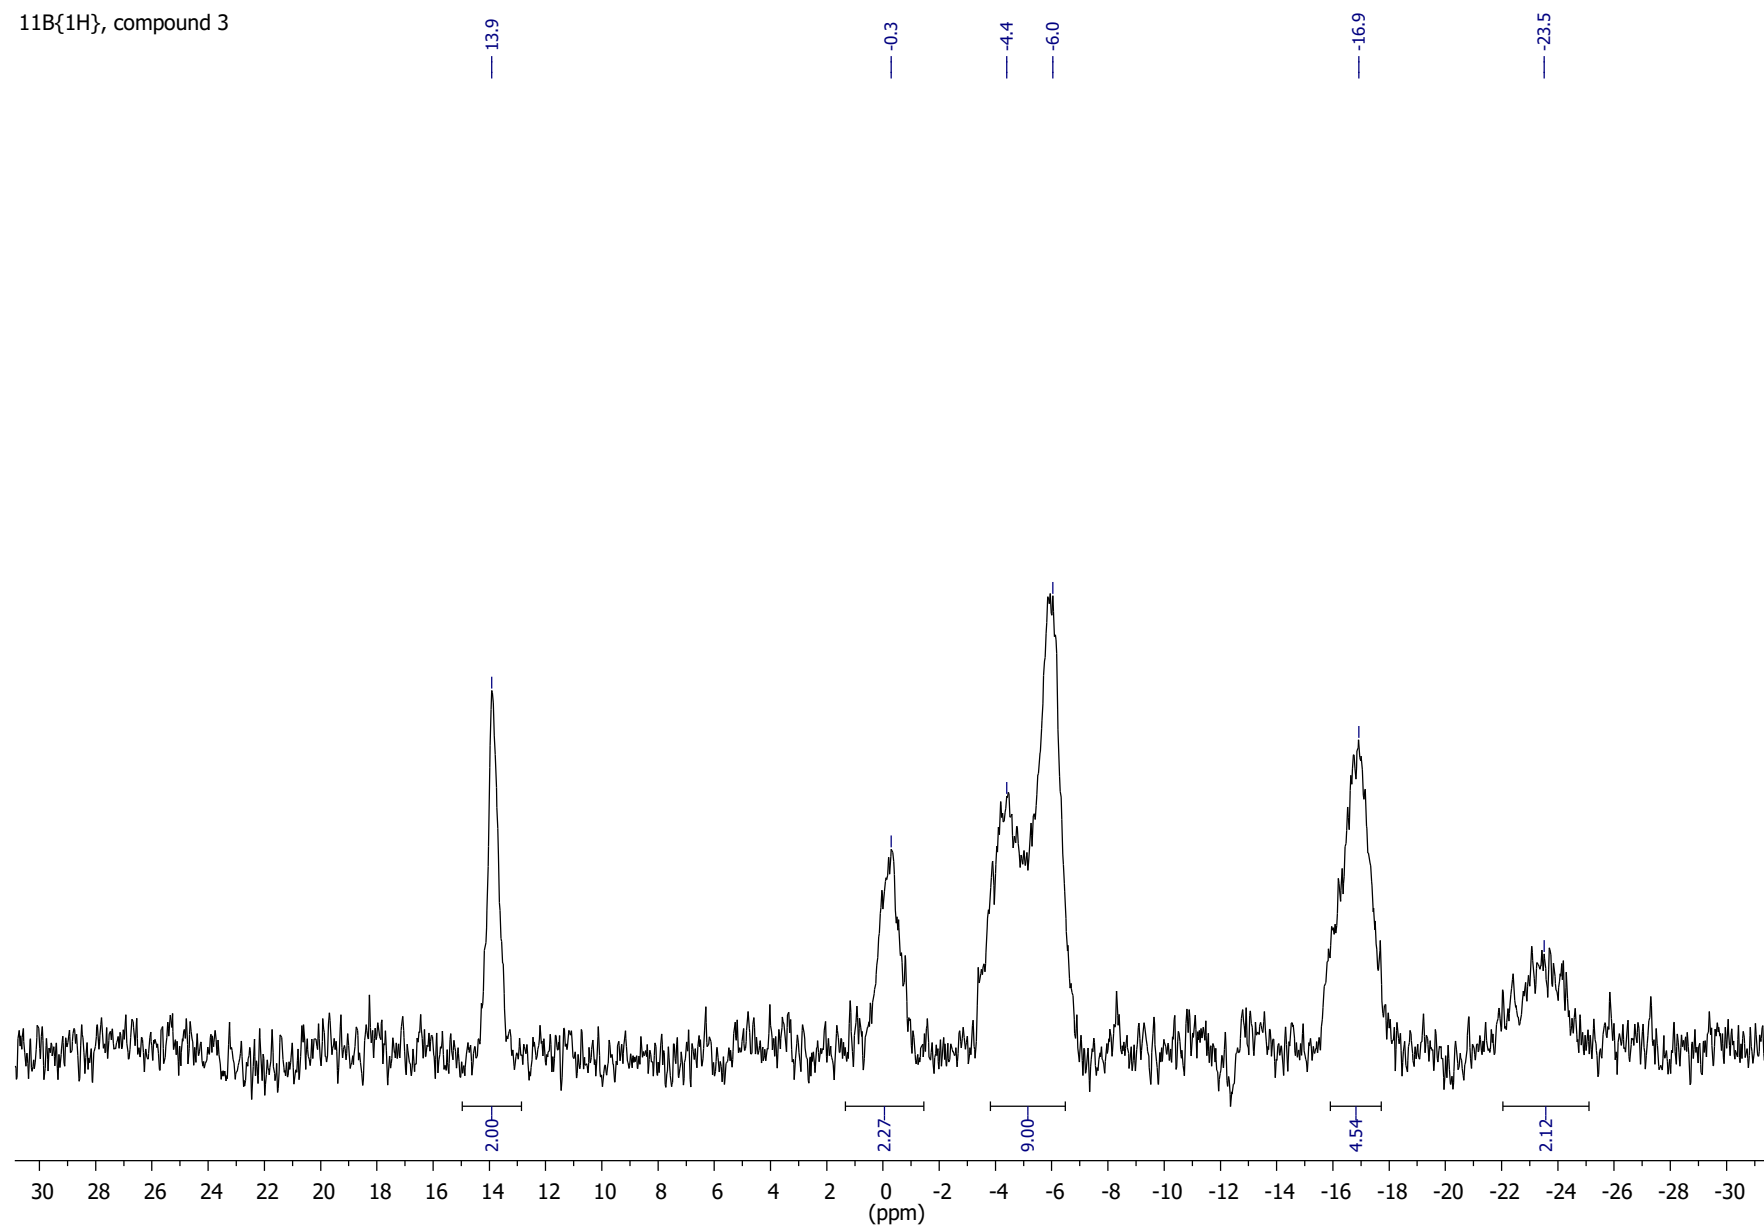

<sup>11</sup>B, compound 3

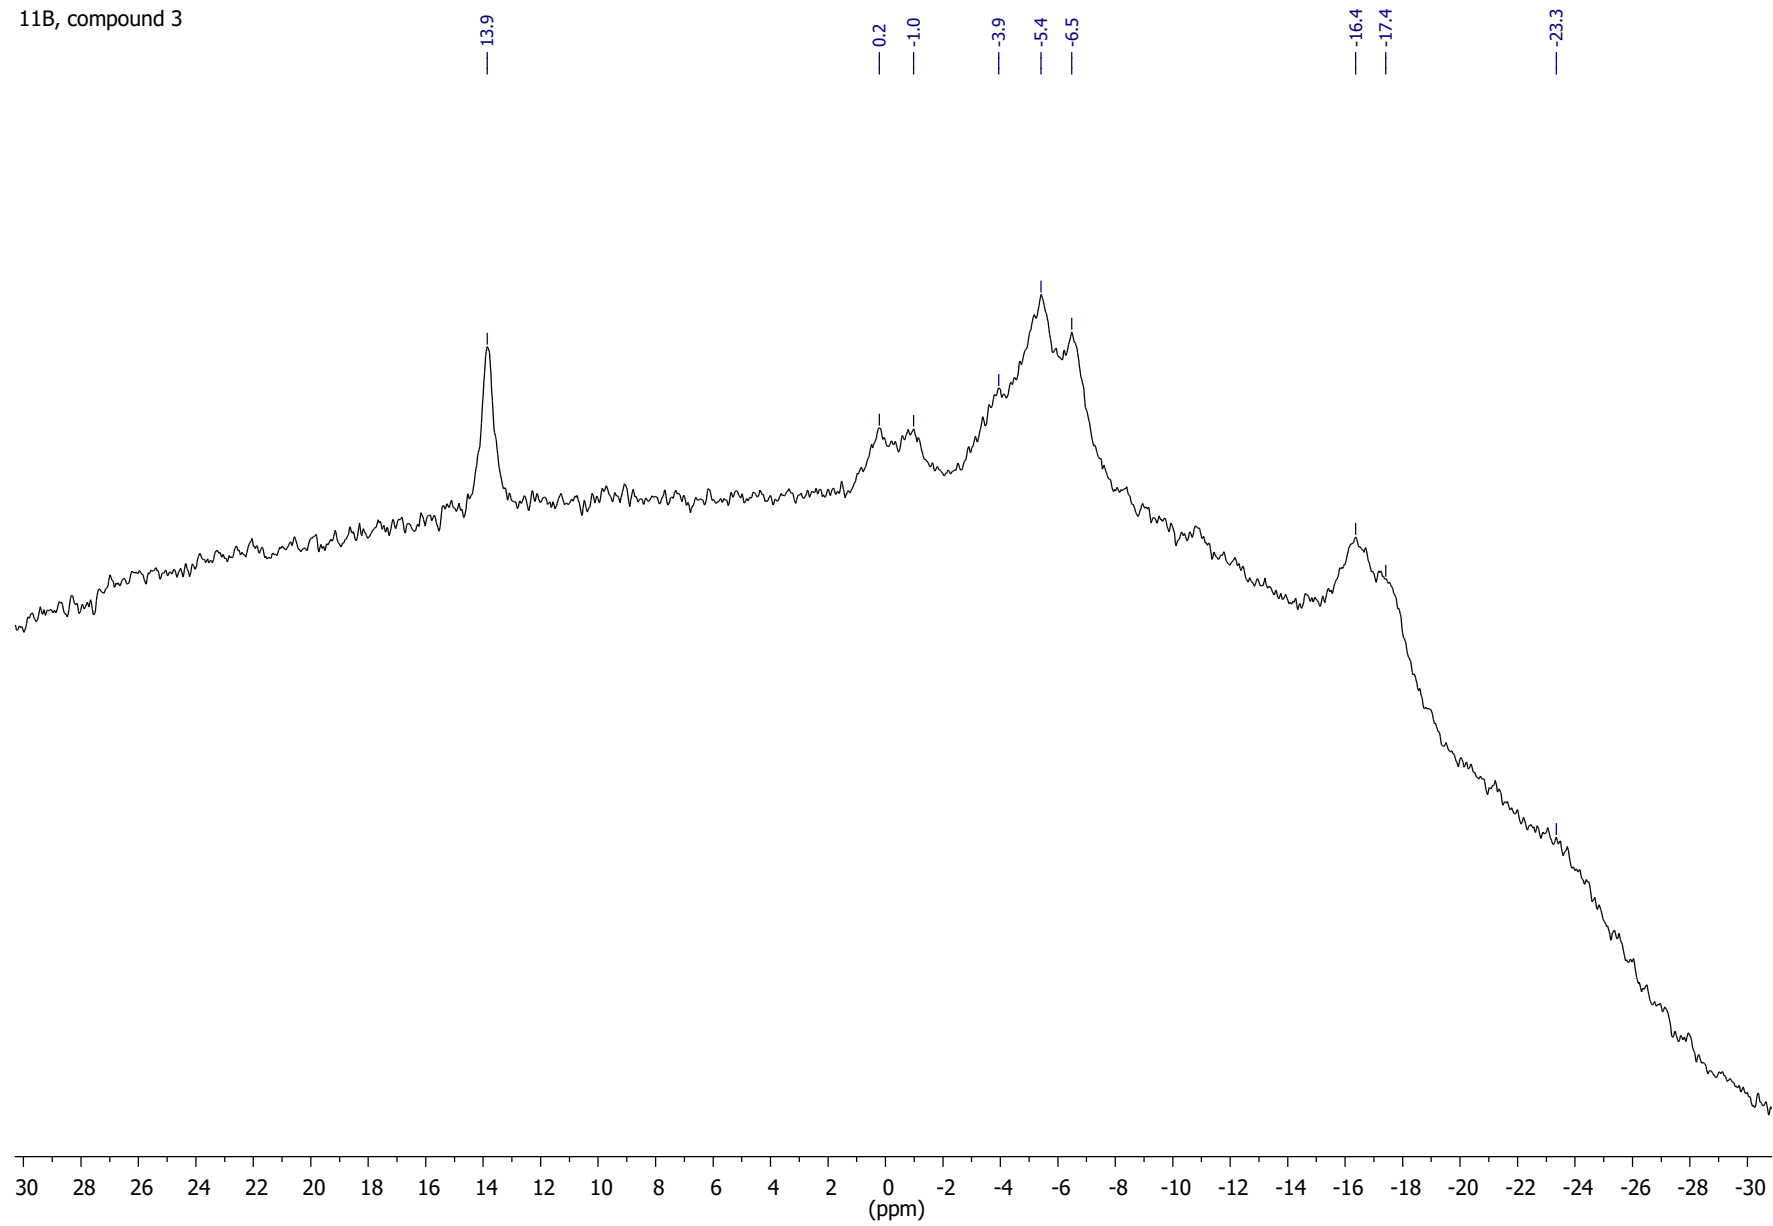



$^{13}\text{C}\{^1\text{H}\}$ , compound 3

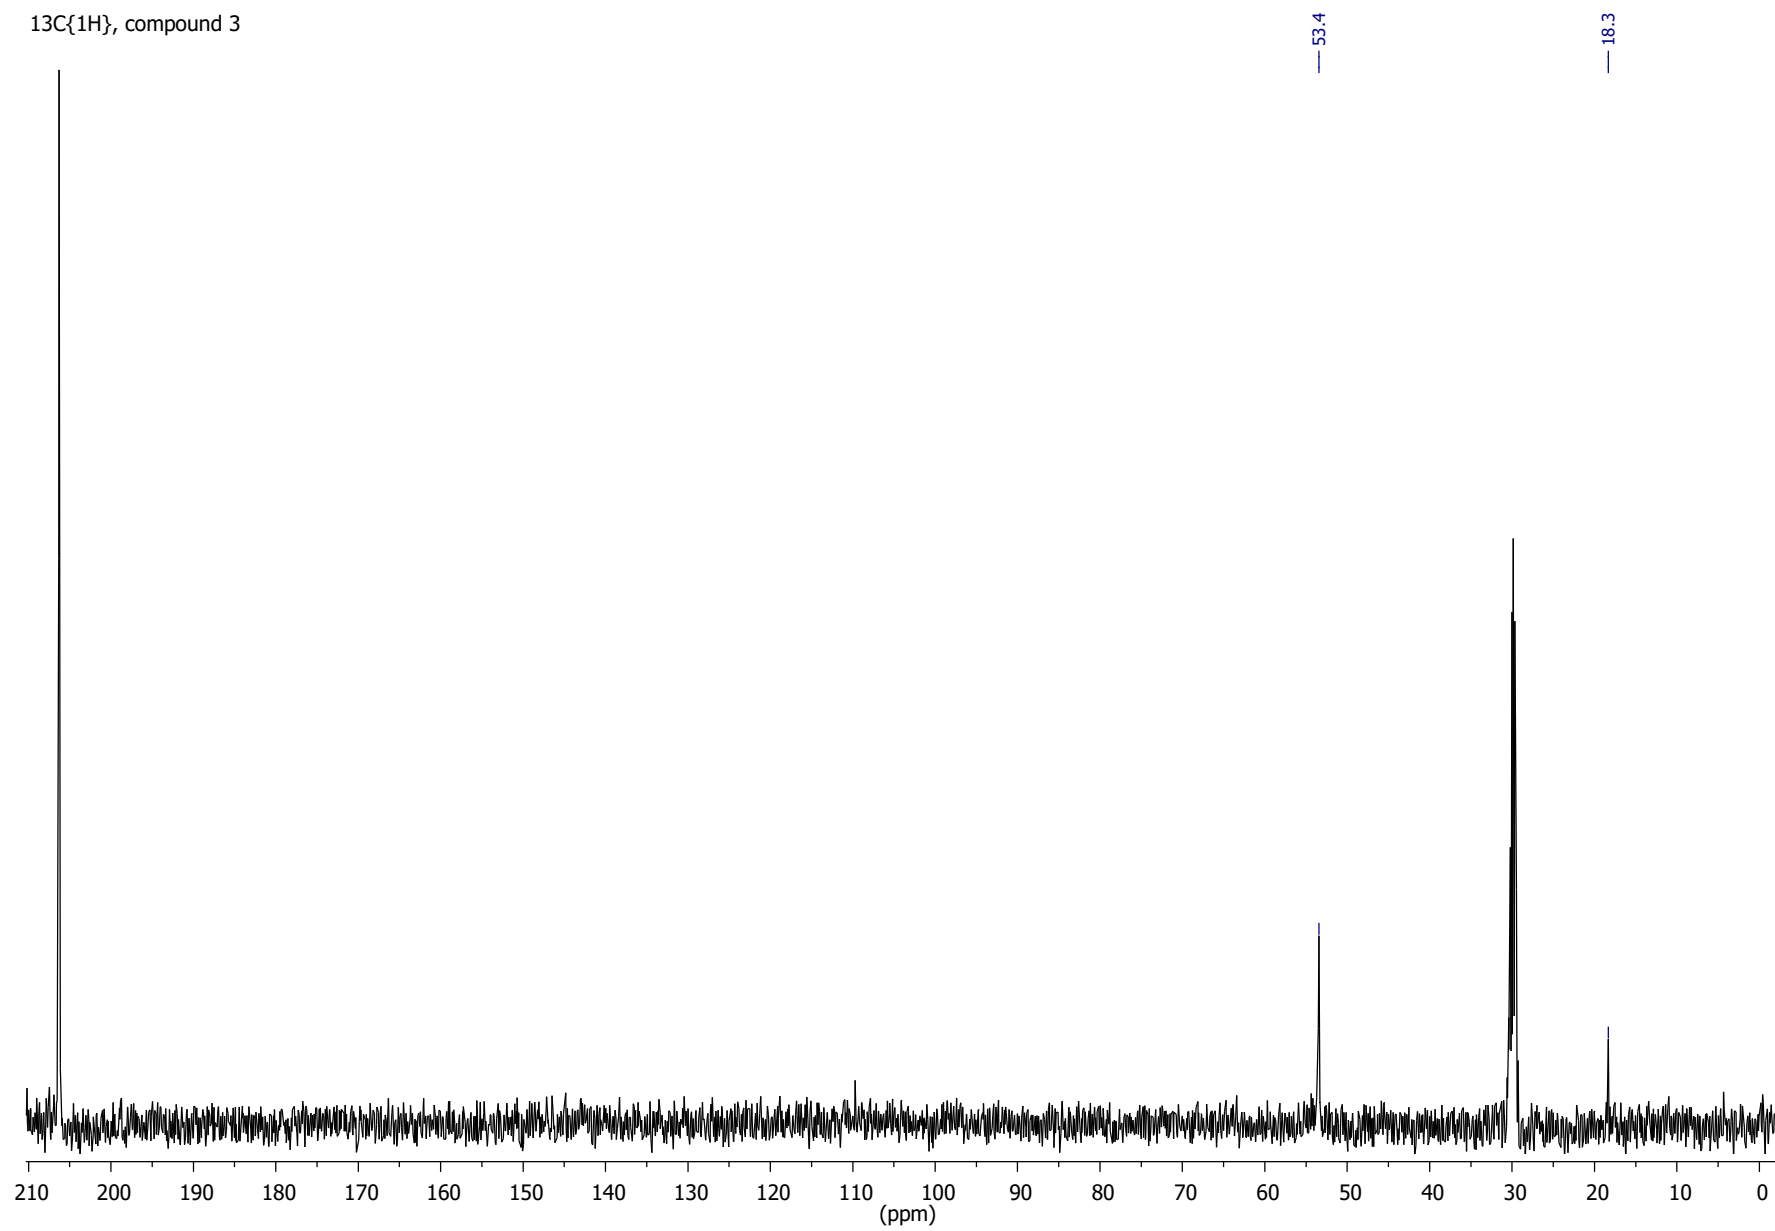

<sup>1</sup>H, compound 4

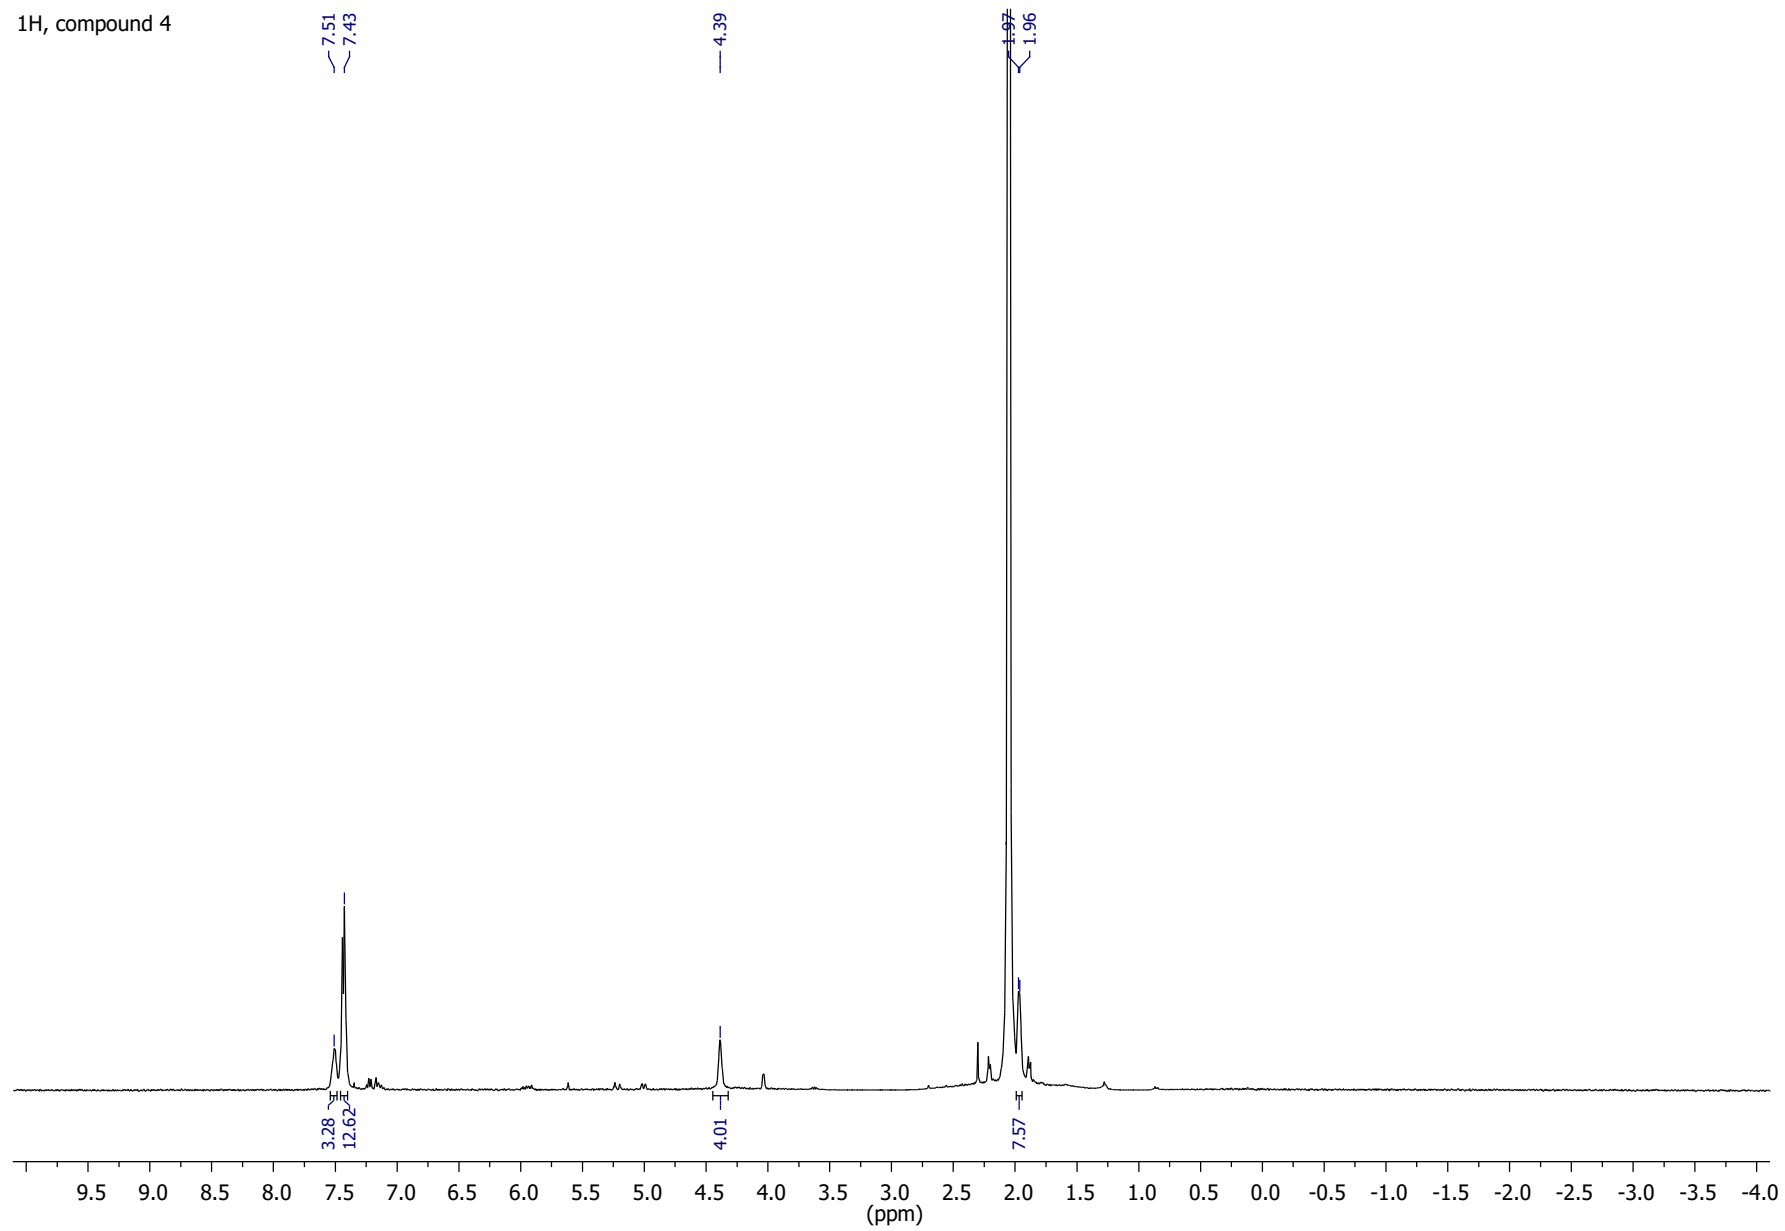

$^{11}\text{B}\{^1\text{H}\}$ , compound 4

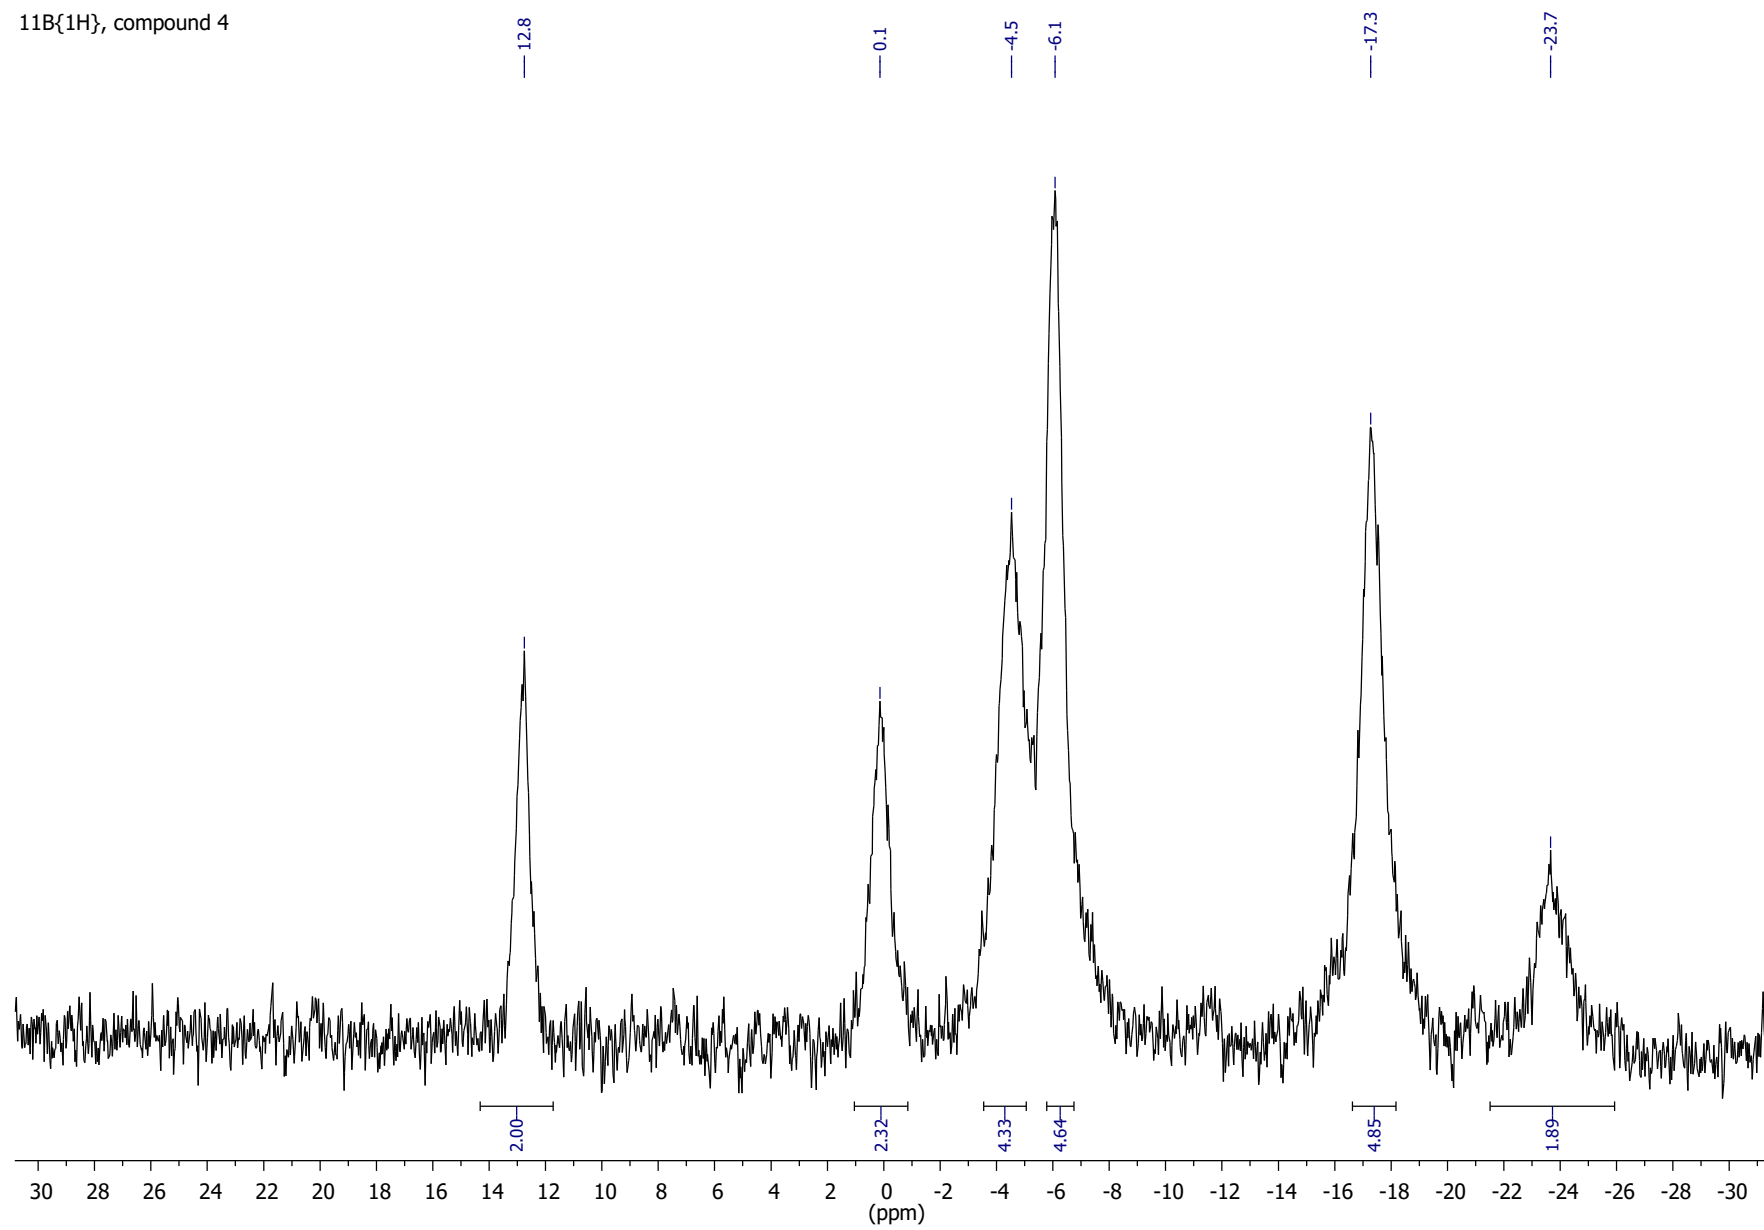

<sup>11</sup>B, compound 4

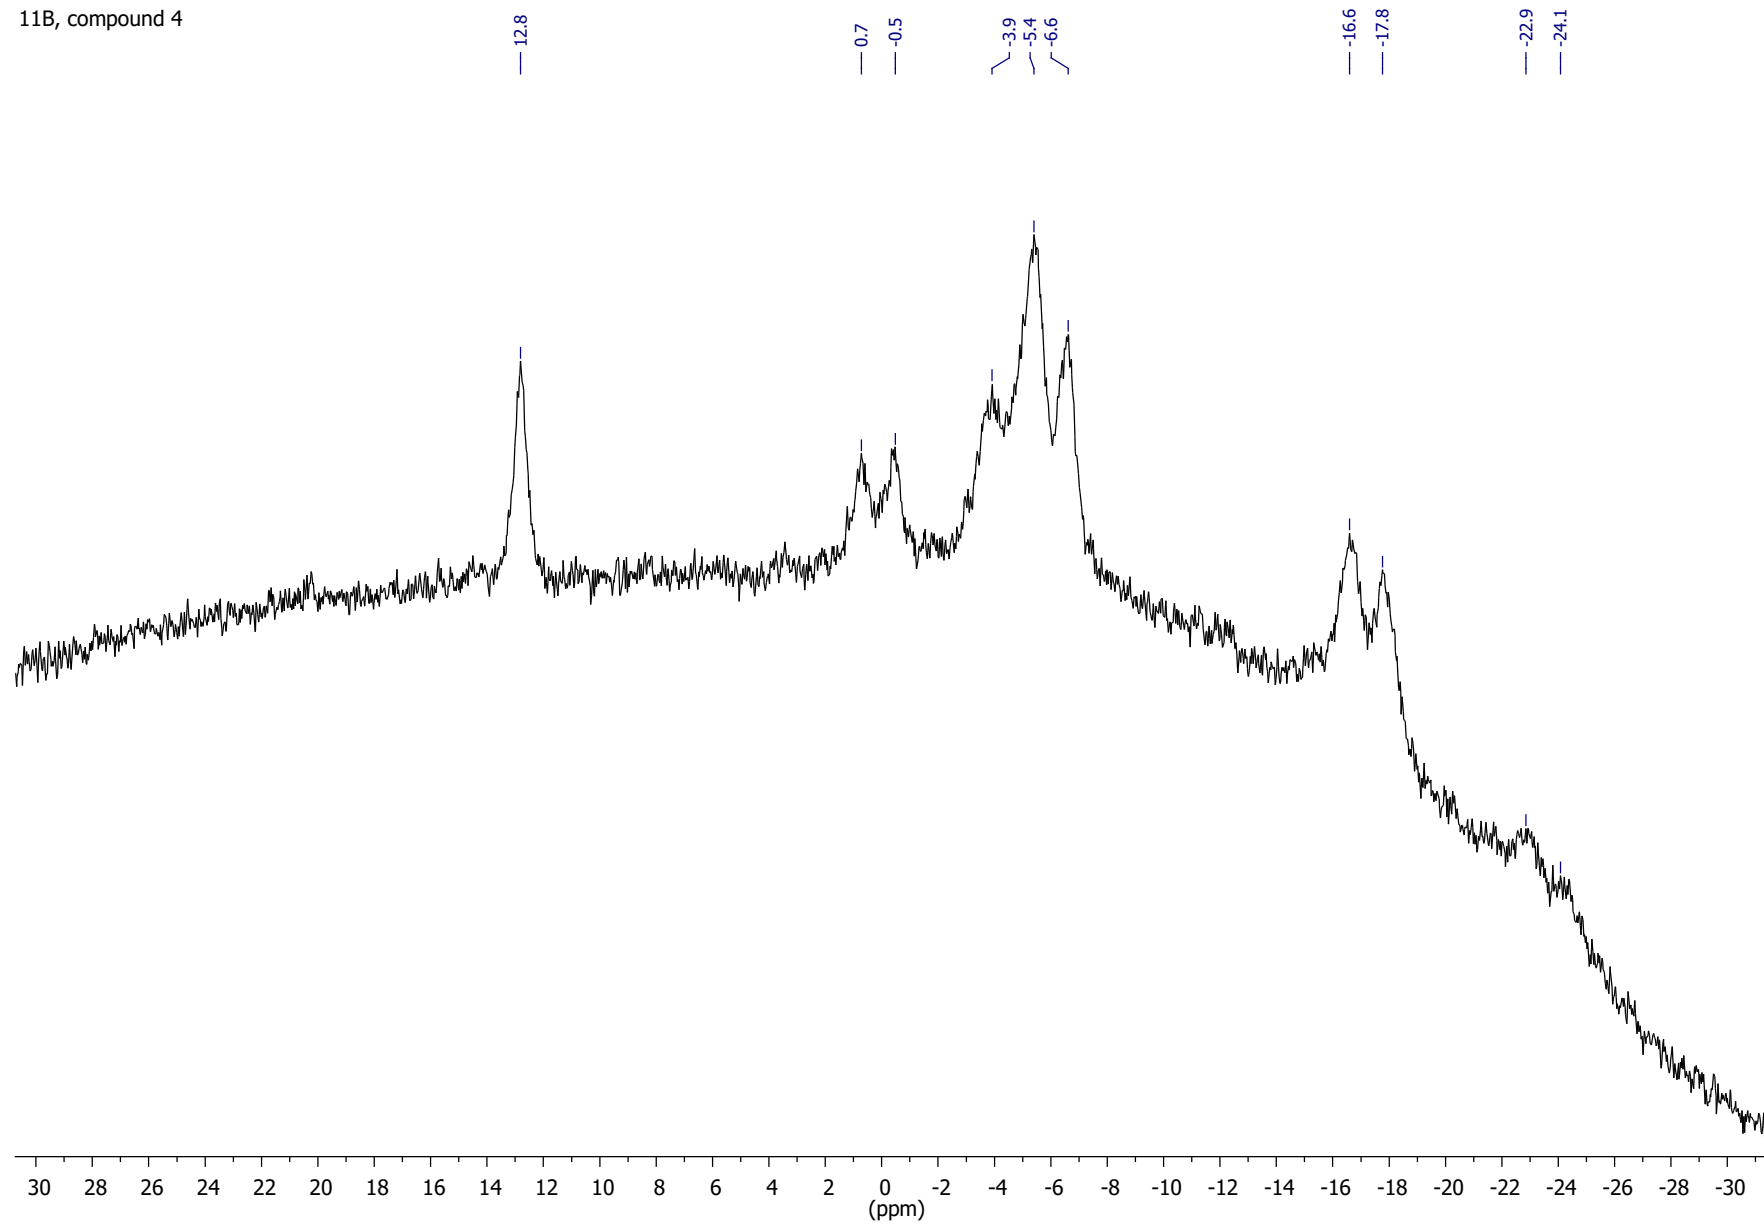

<sup>1</sup>H, compound 5

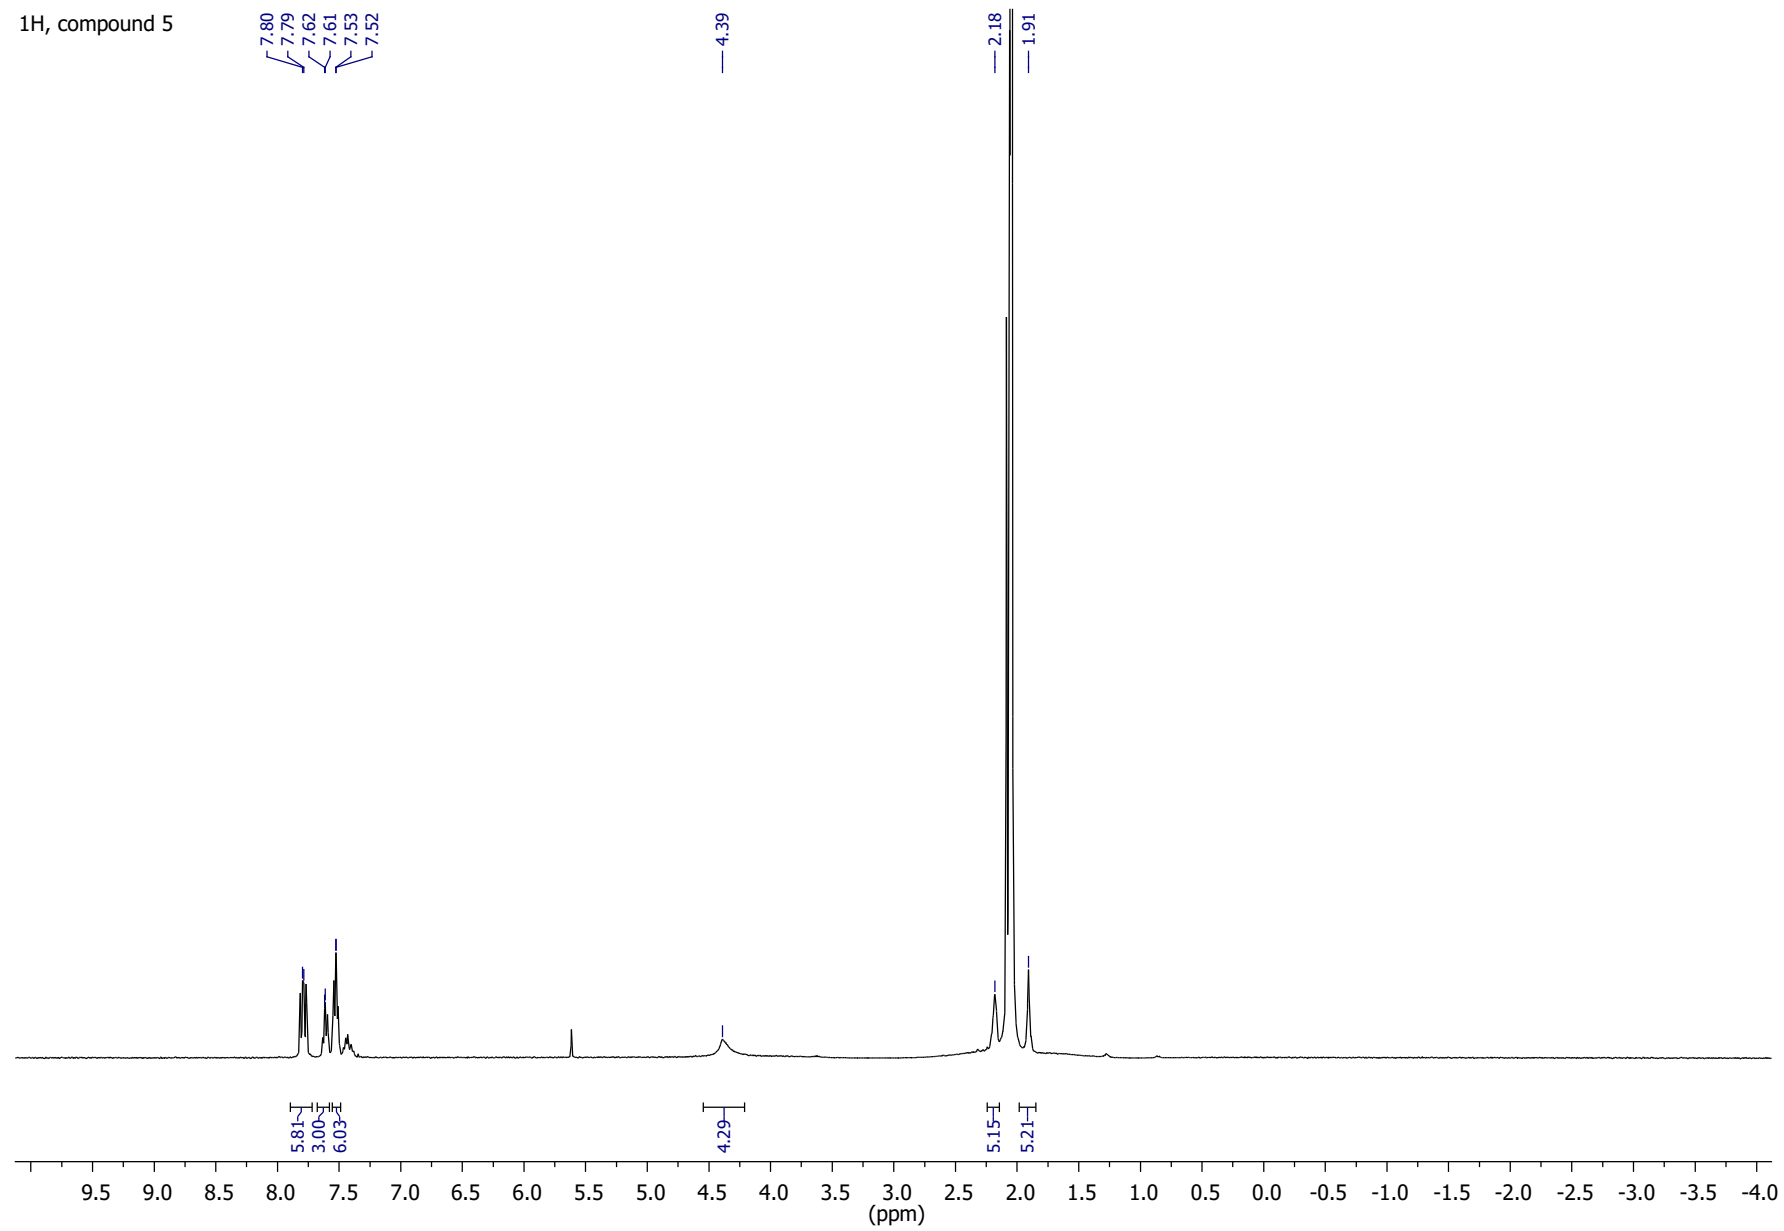

$^{11}\text{B}\{^1\text{H}\}$ , compound 5

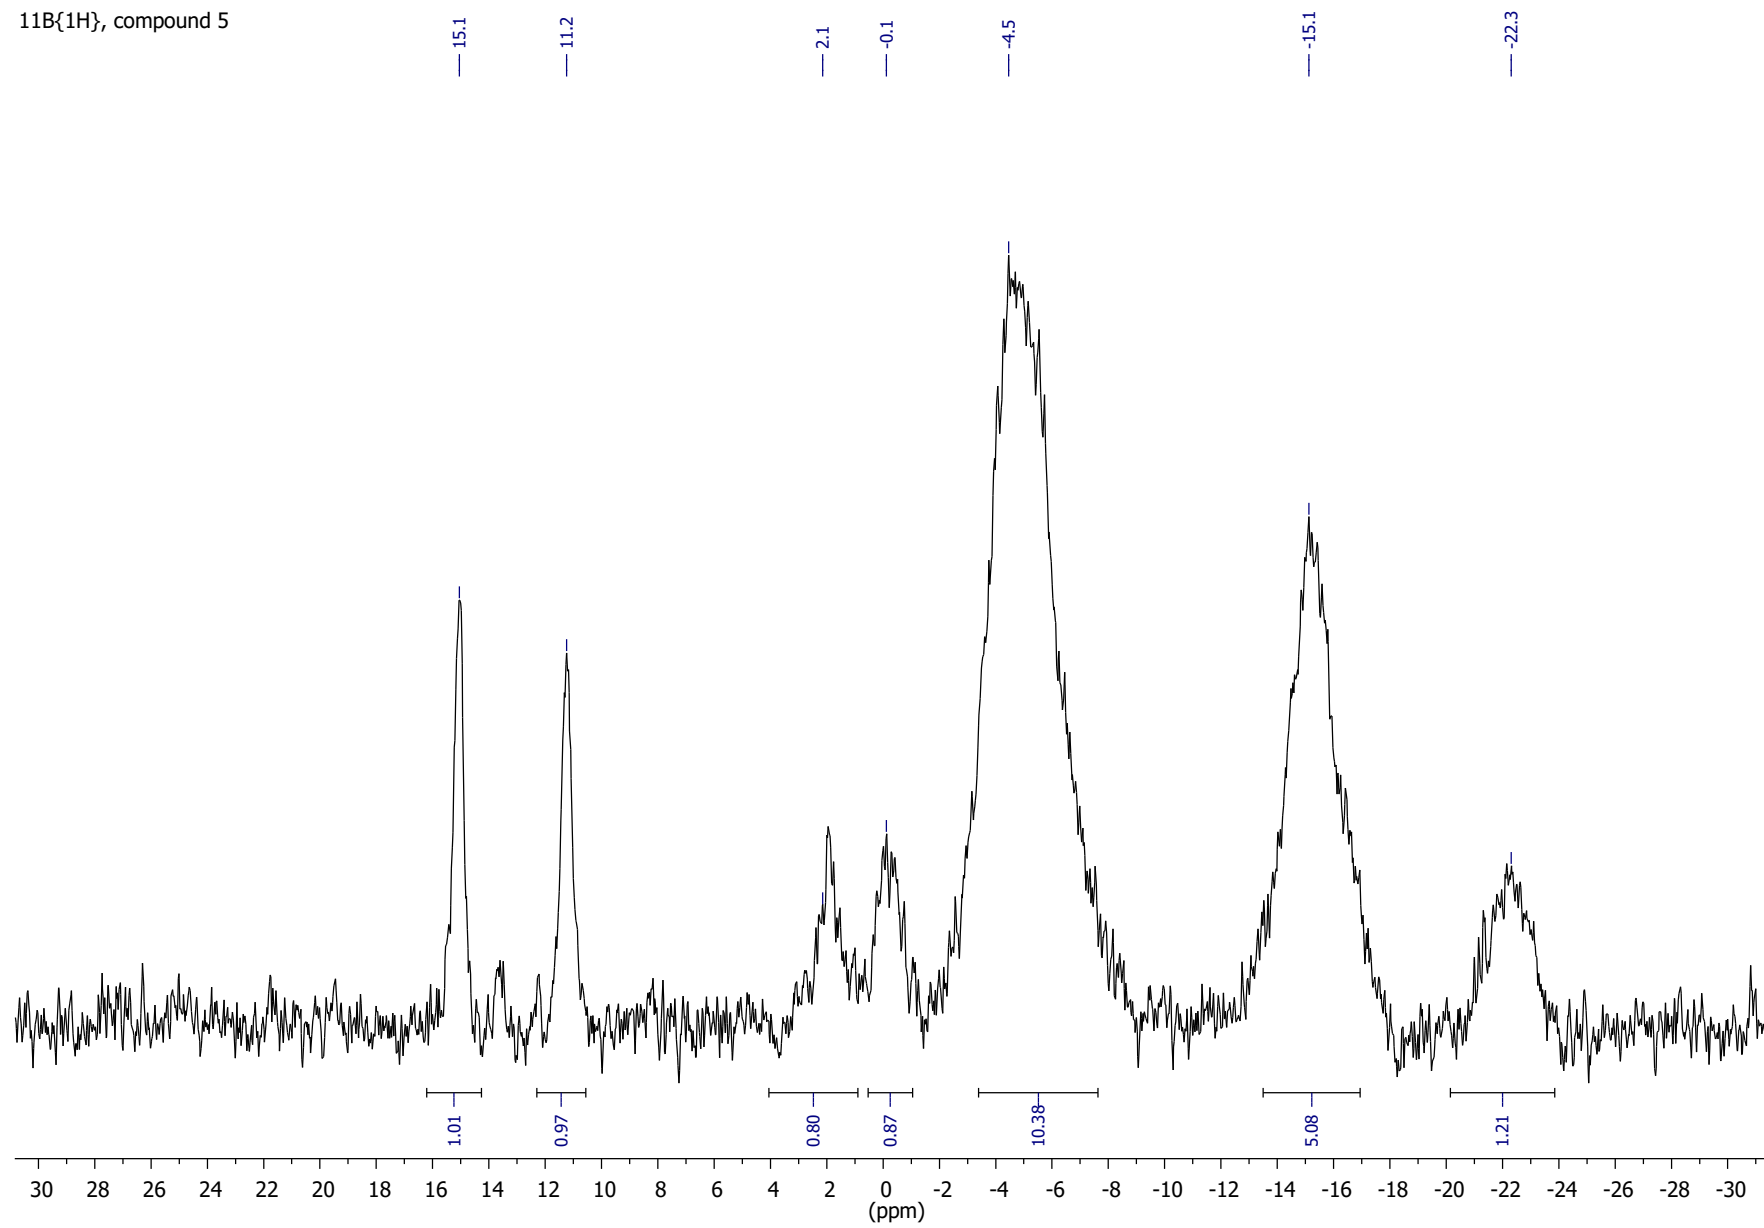

$^{11}\text{B}$ , compound 5

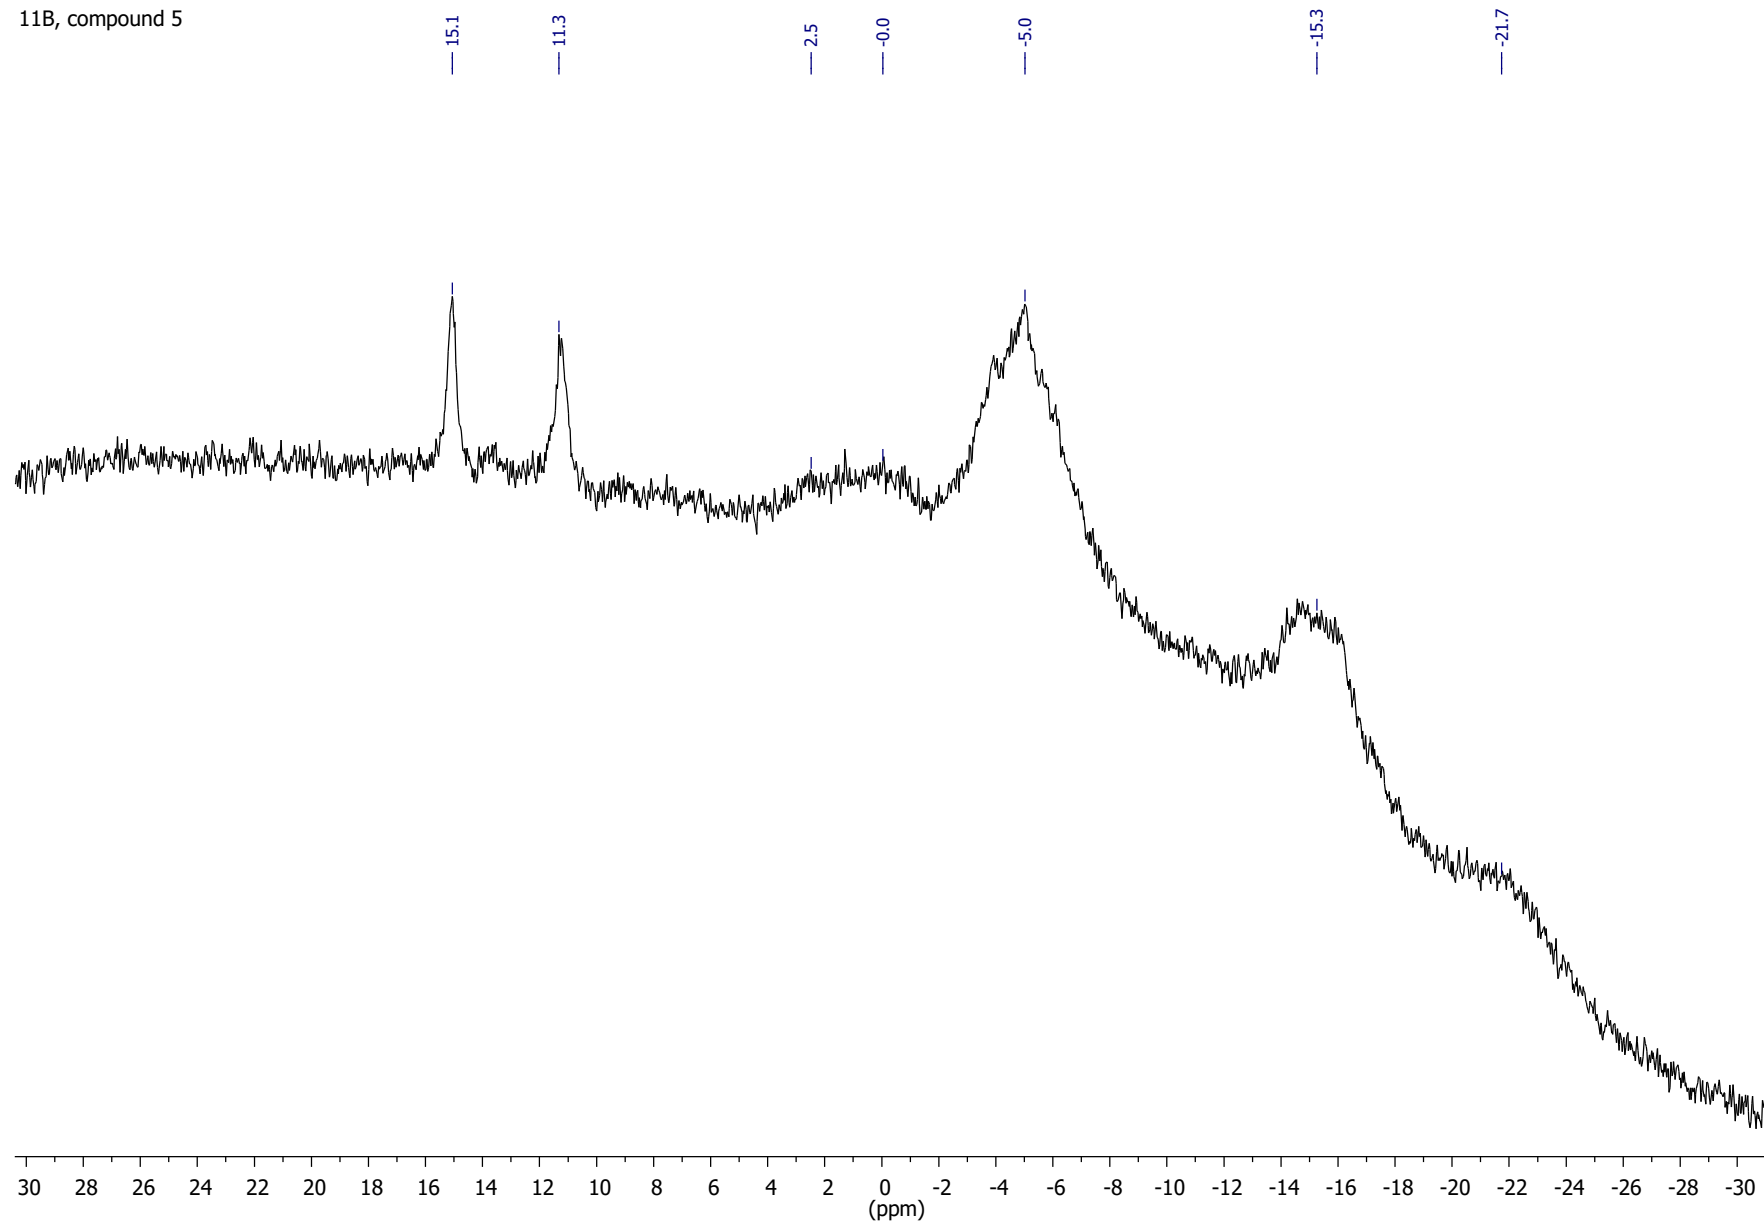

<sup>1</sup>H, compound 6

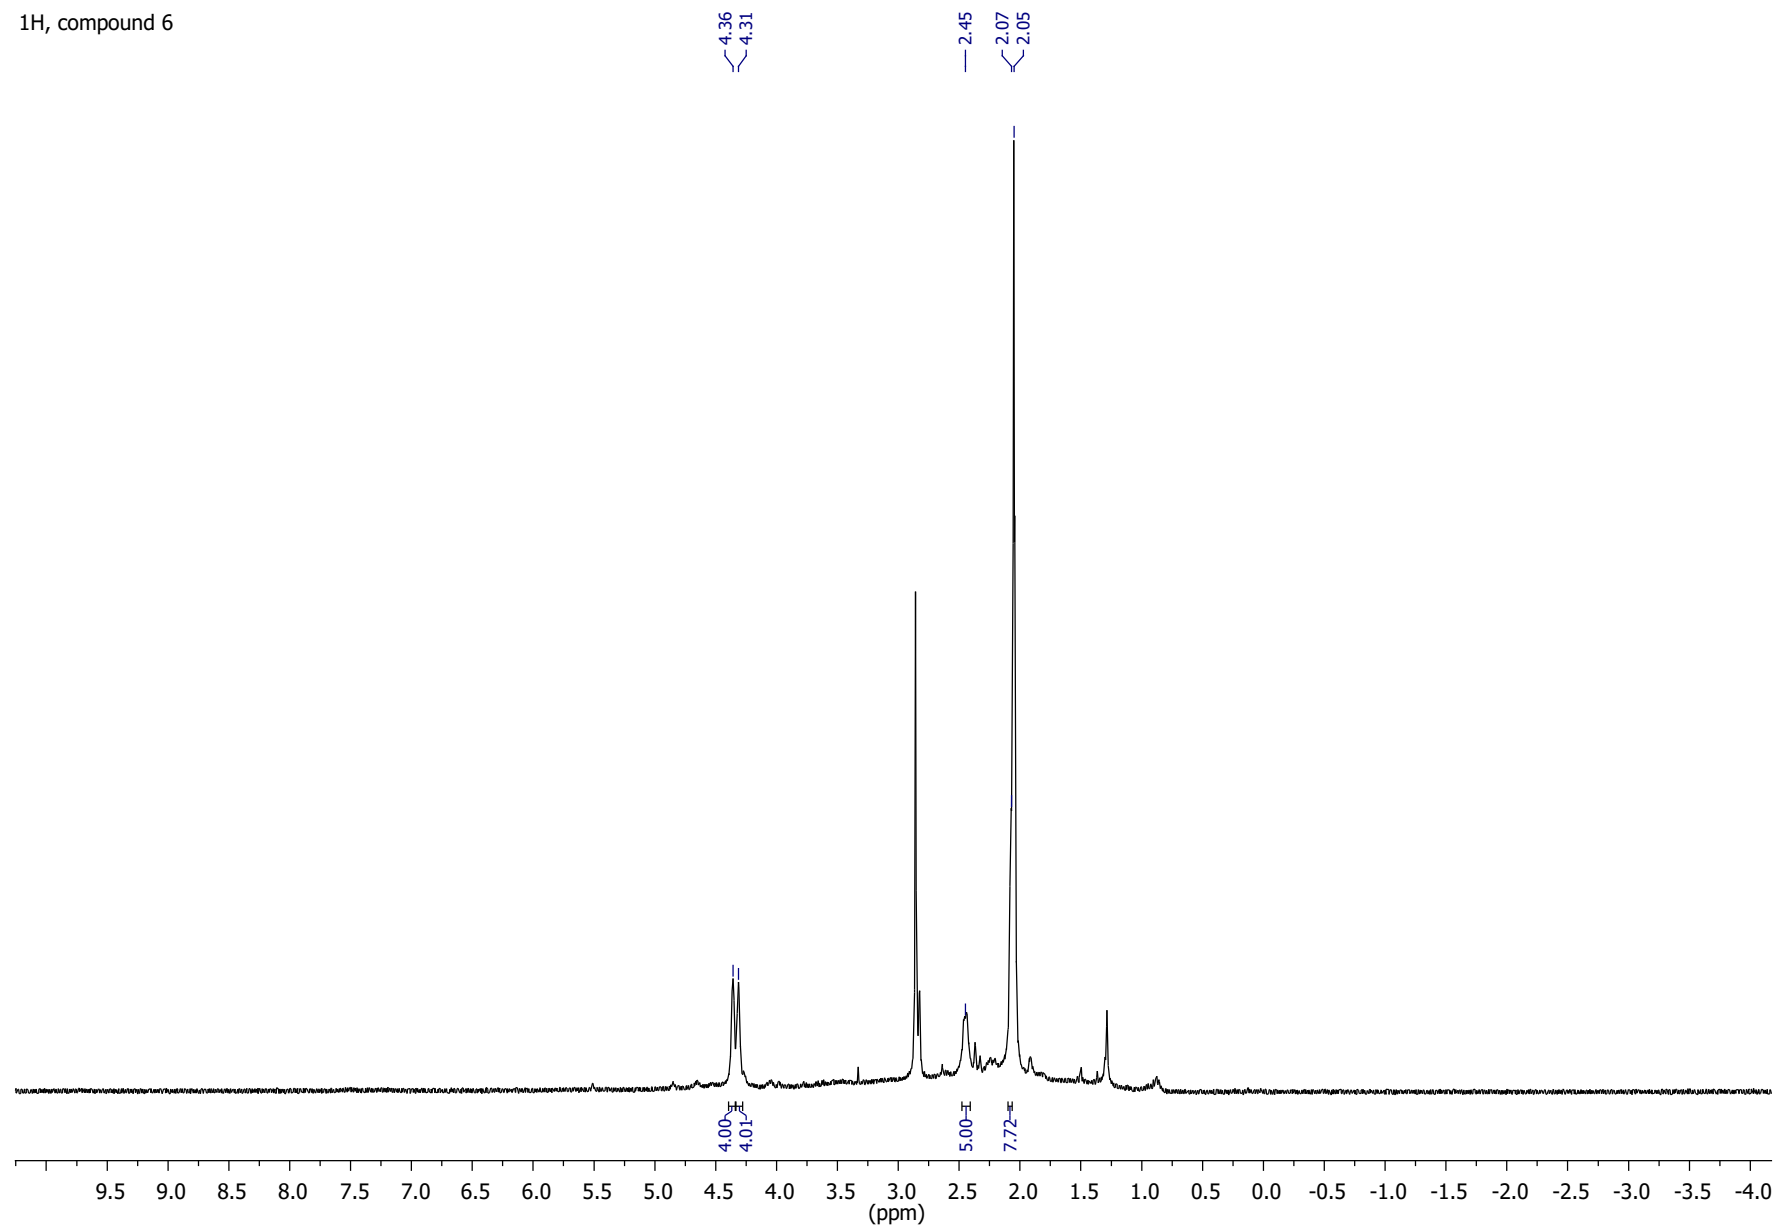



$^{11}\text{B}\{^1\text{H}\}$ , compound 6

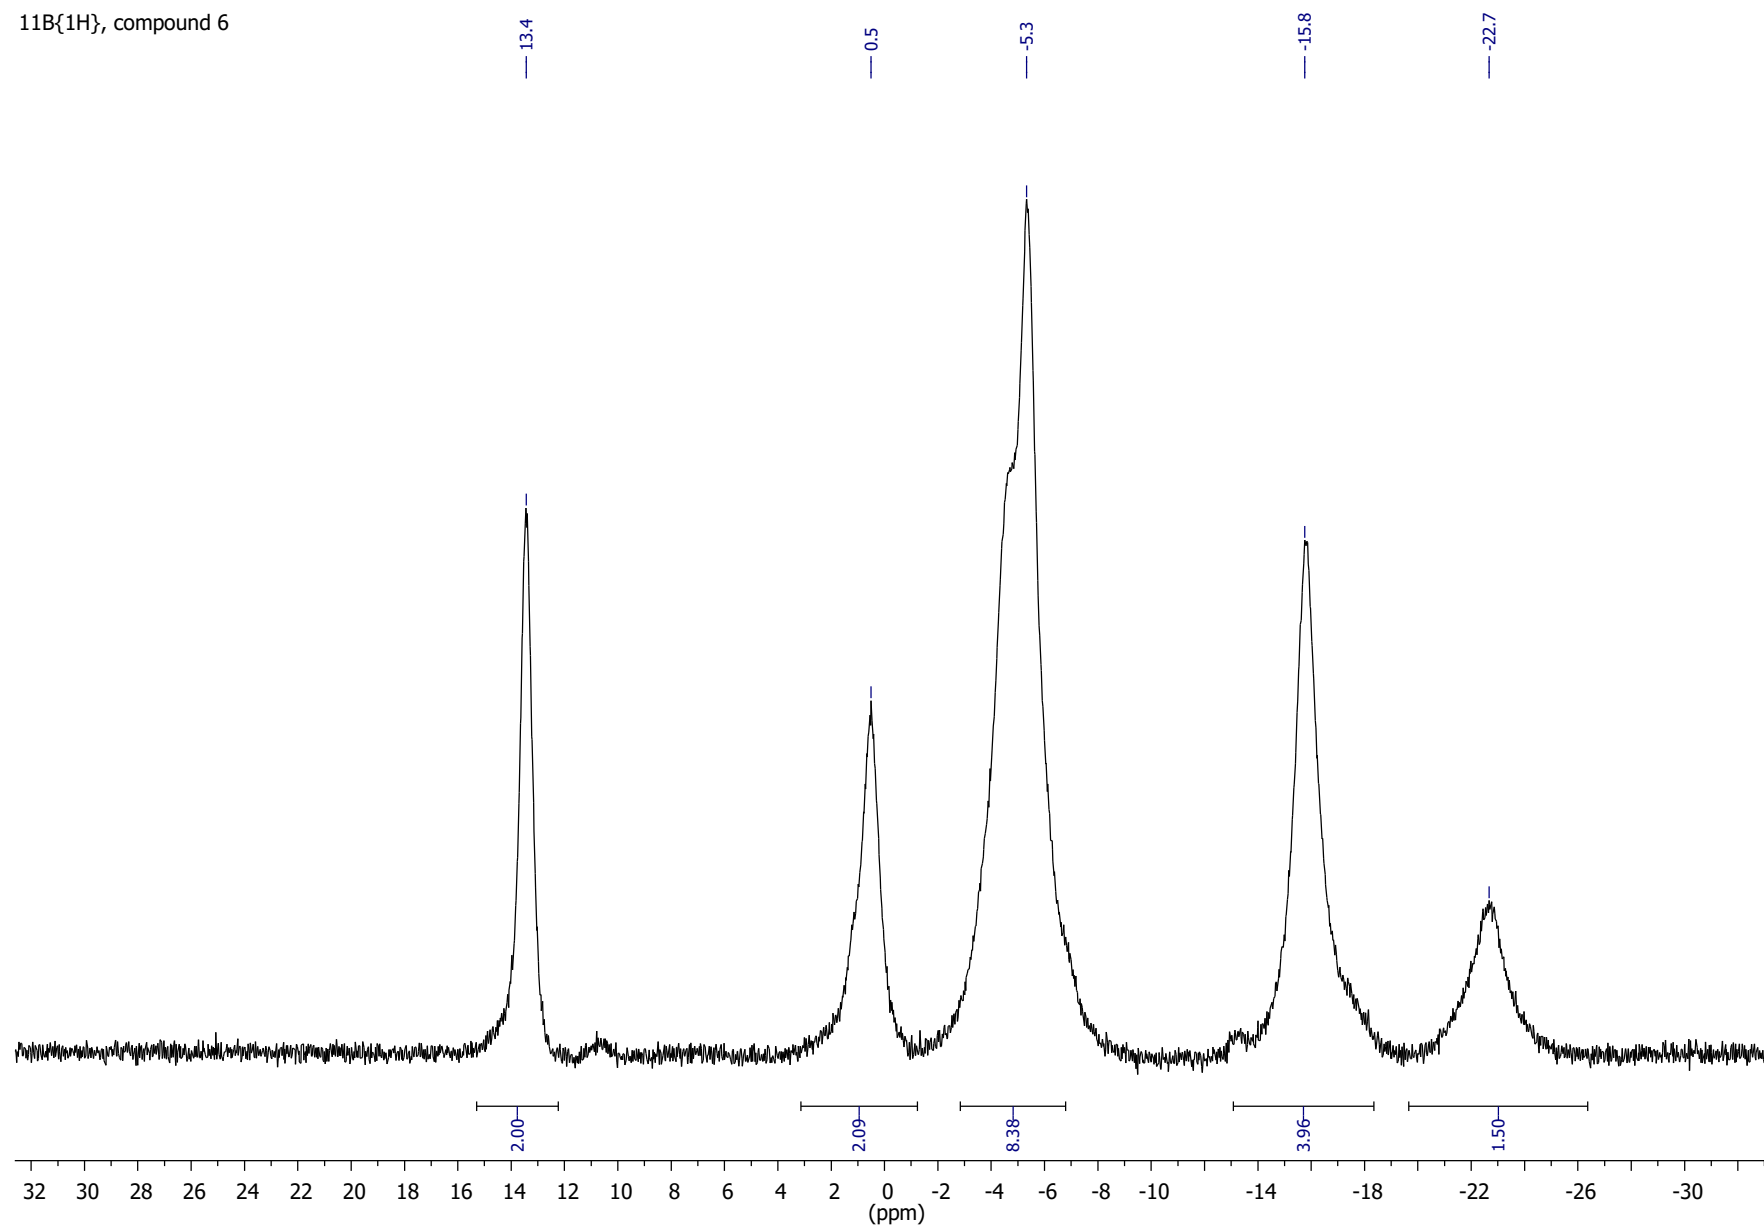

$^{11}\text{B}$ , compound 6

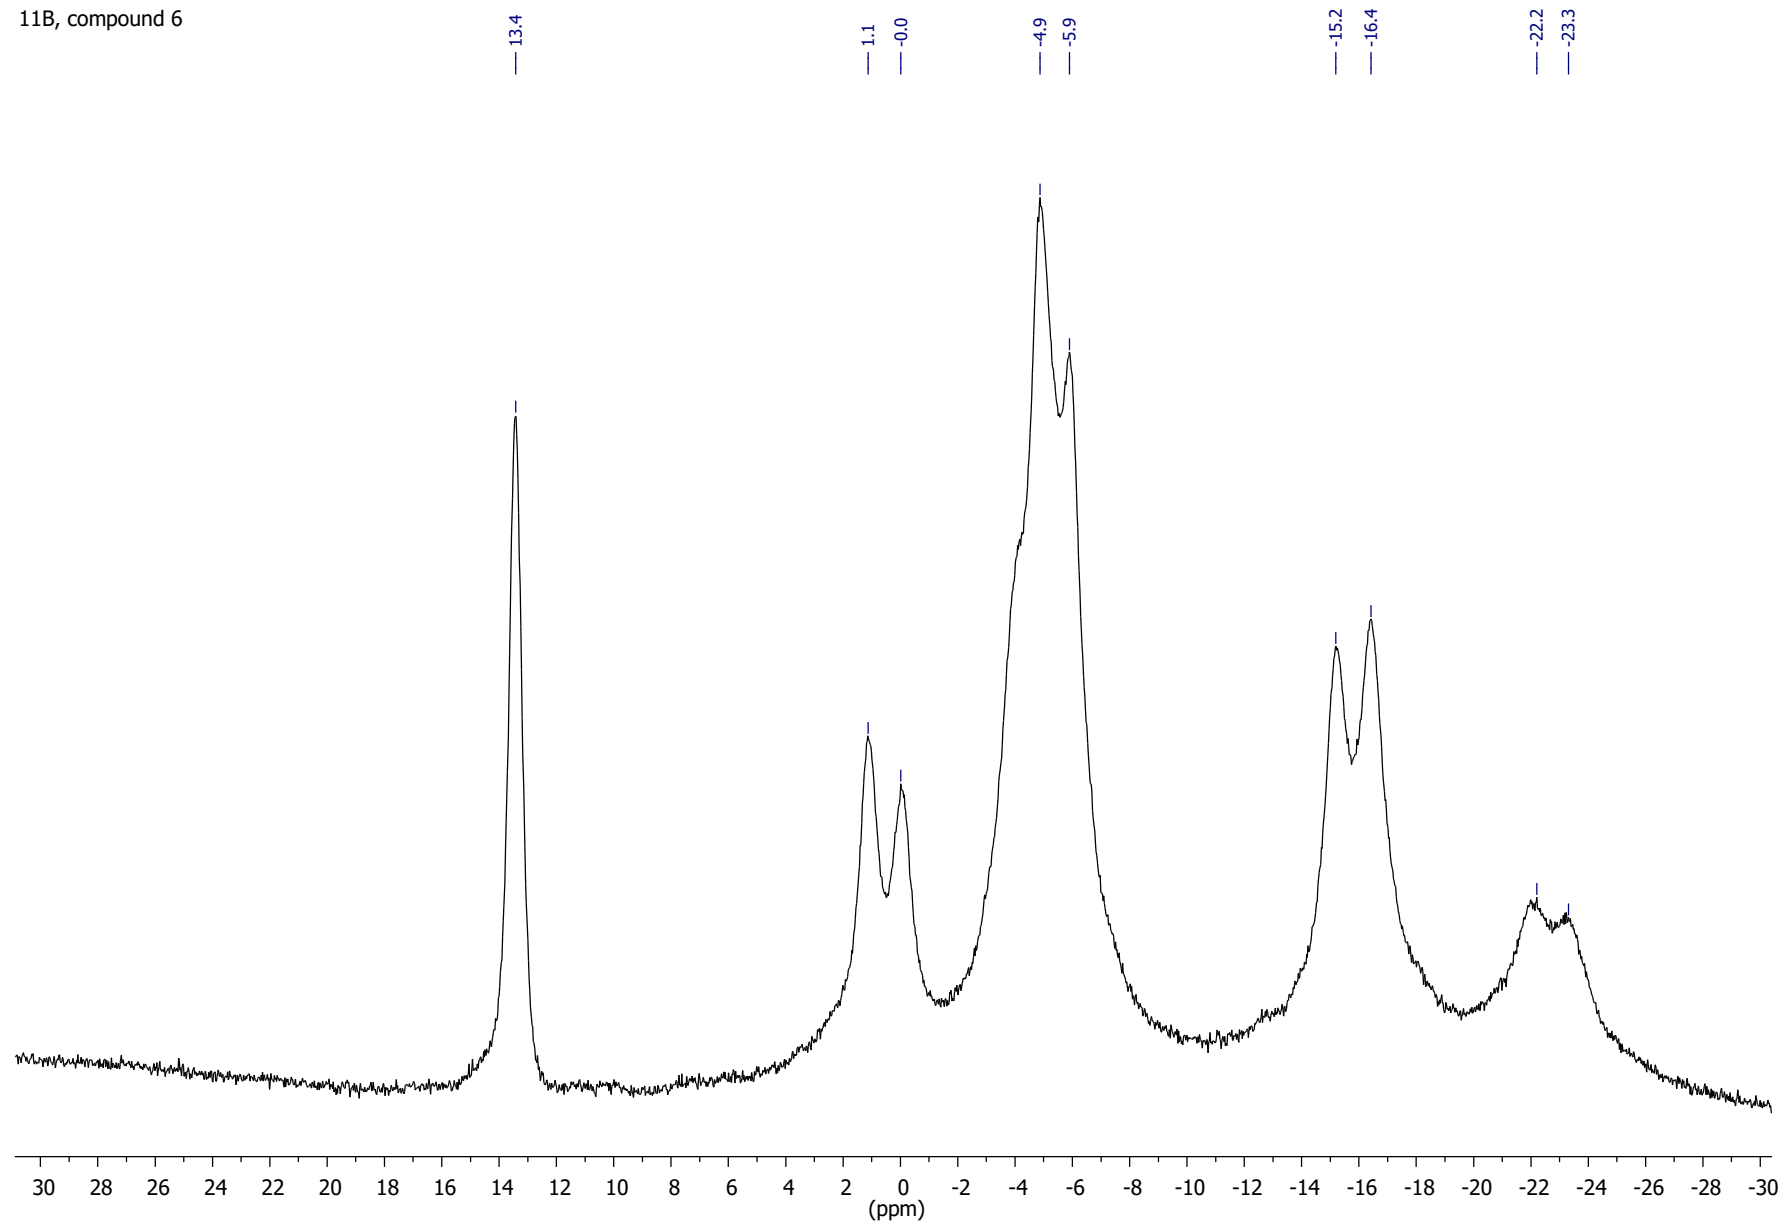

$^{13}\text{C}\{^1\text{H}\}$ , compound 6

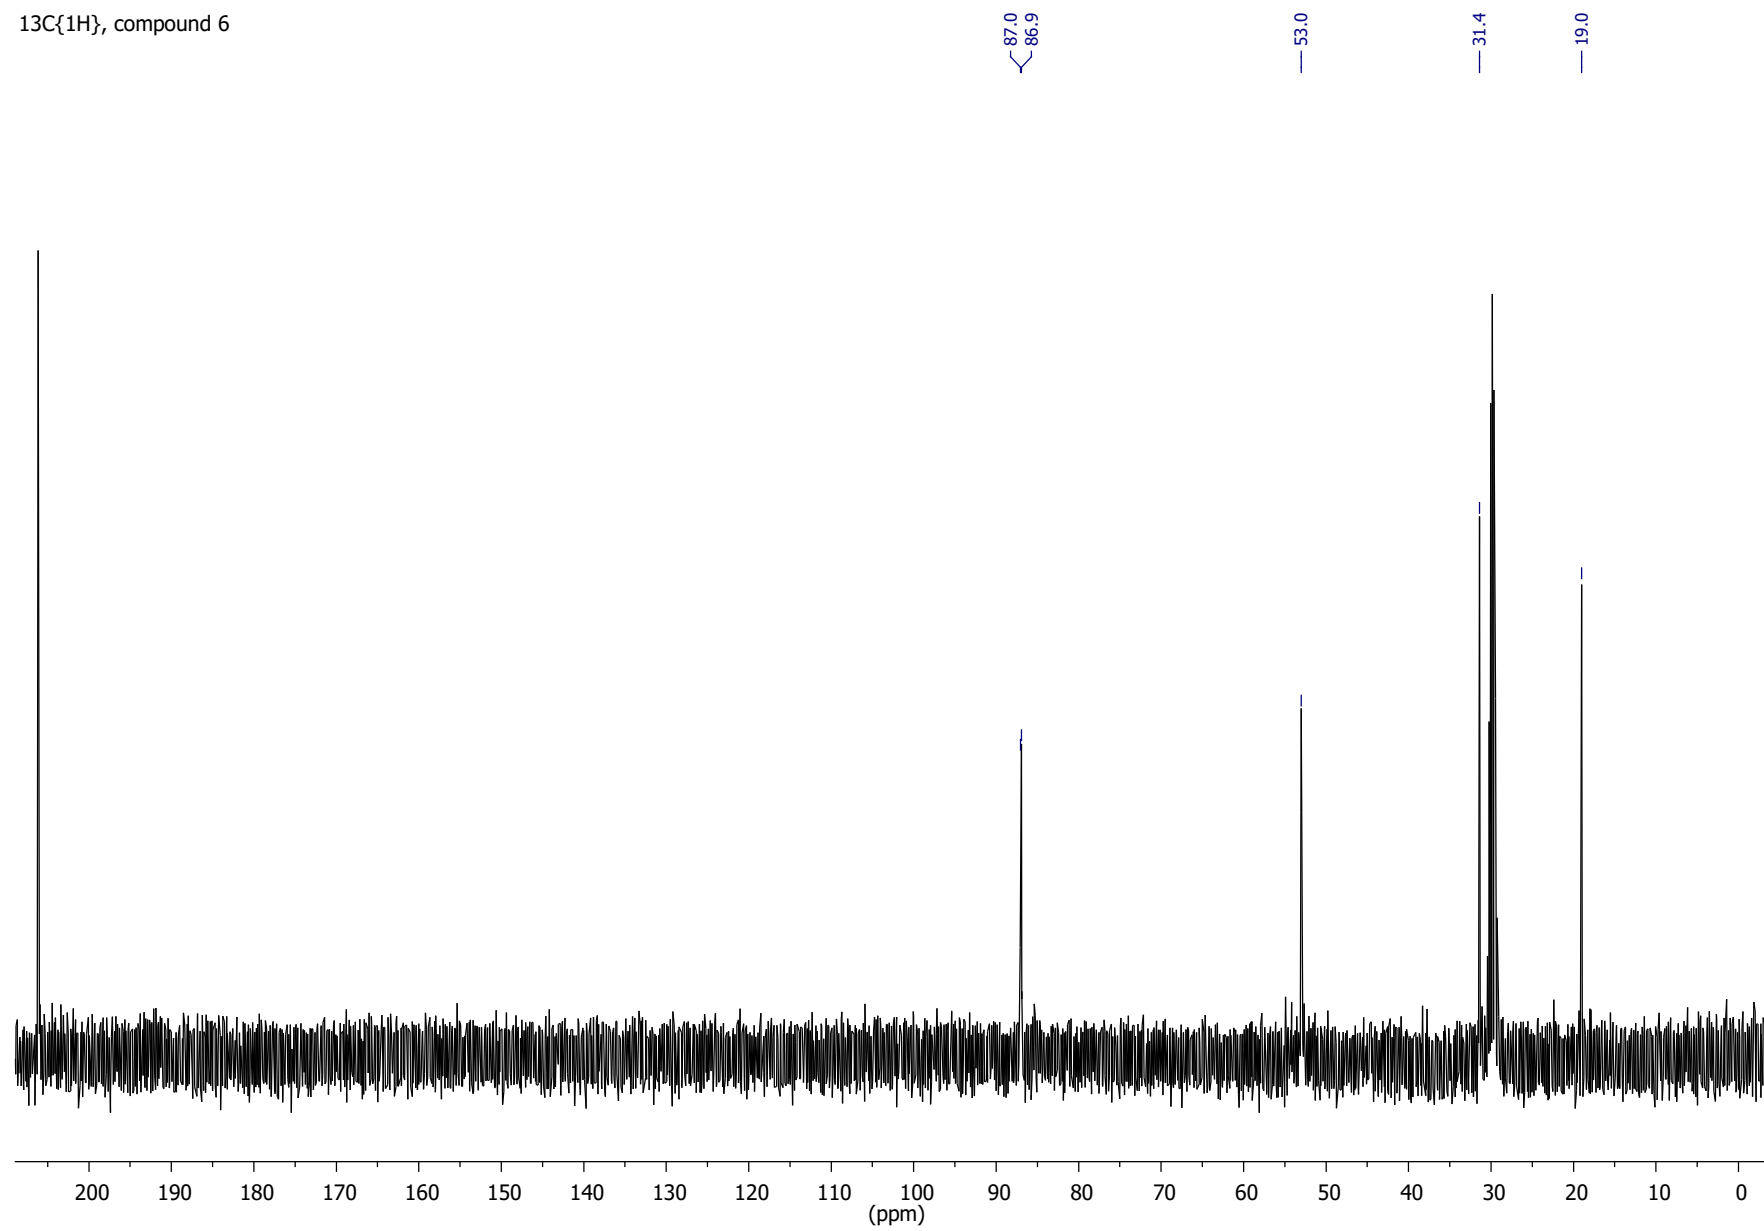

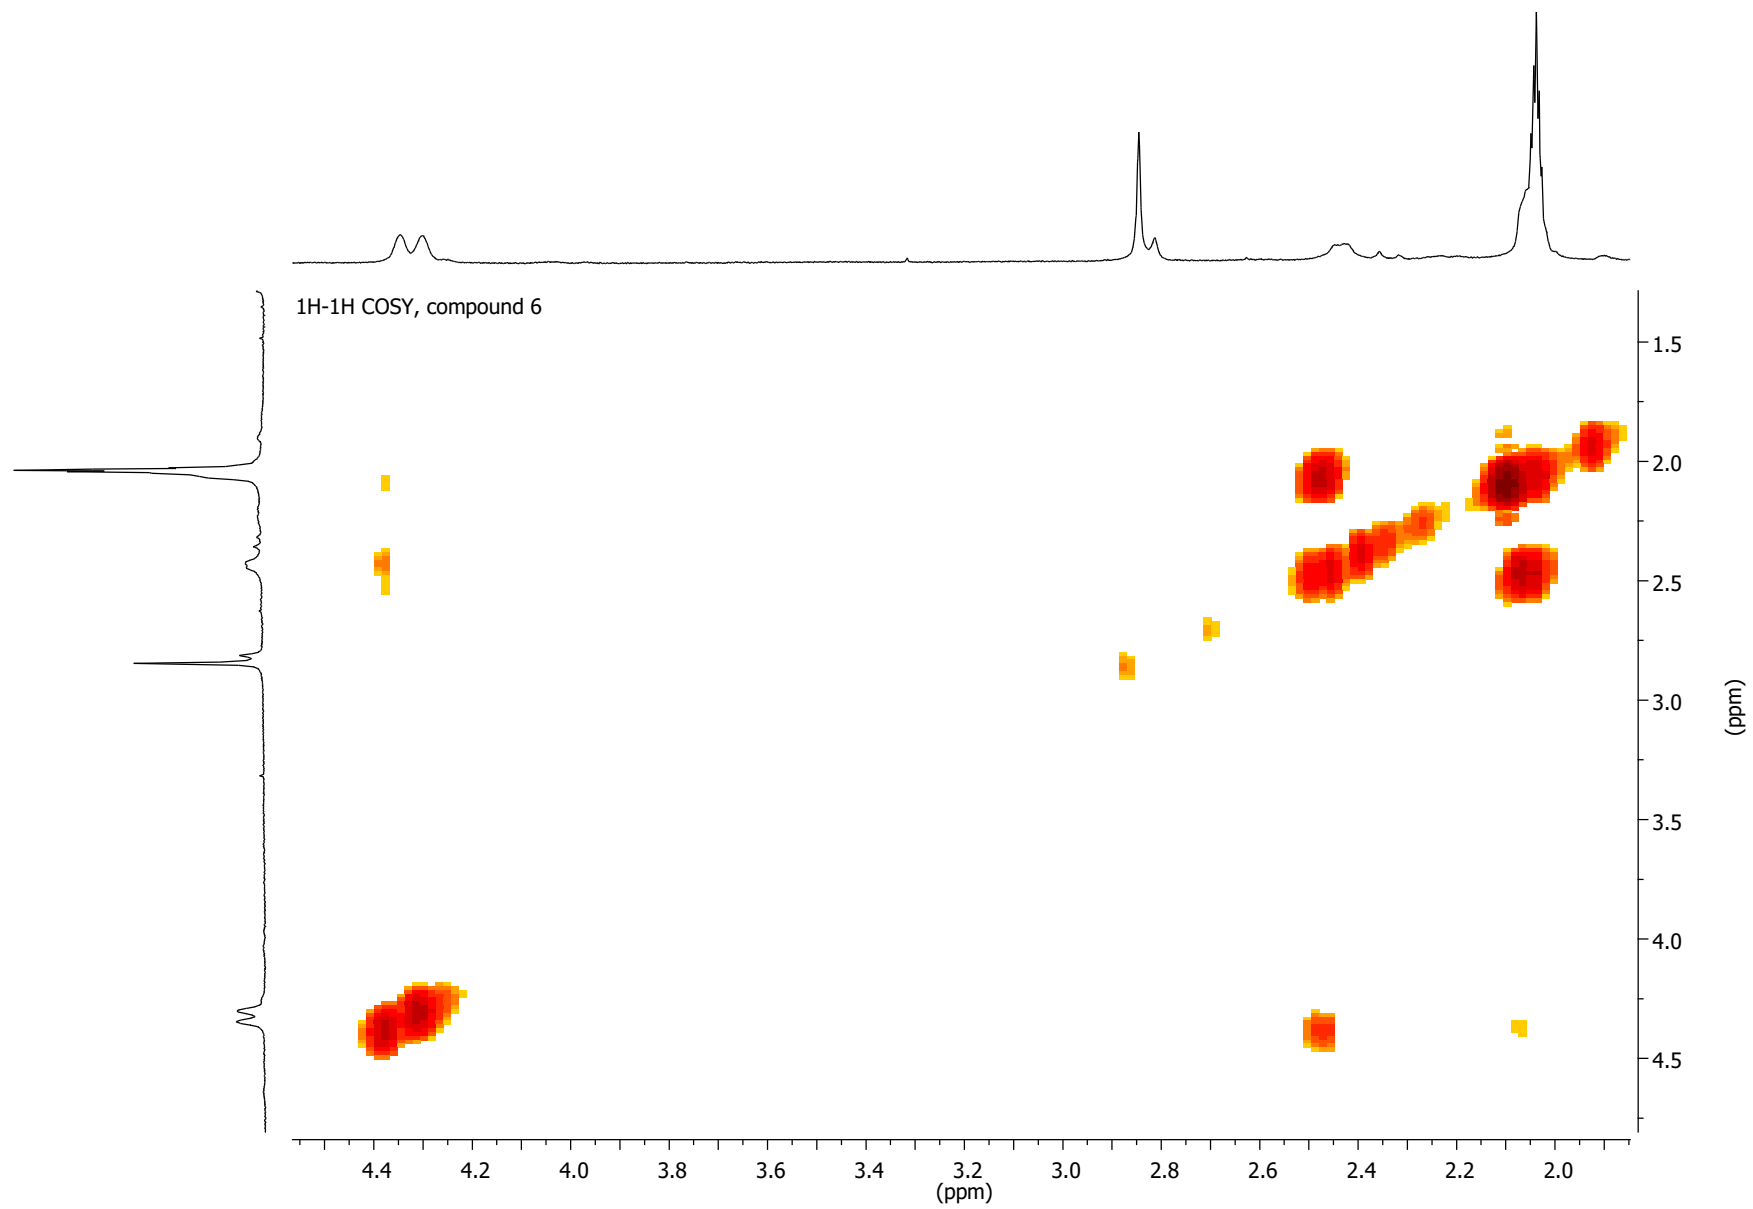

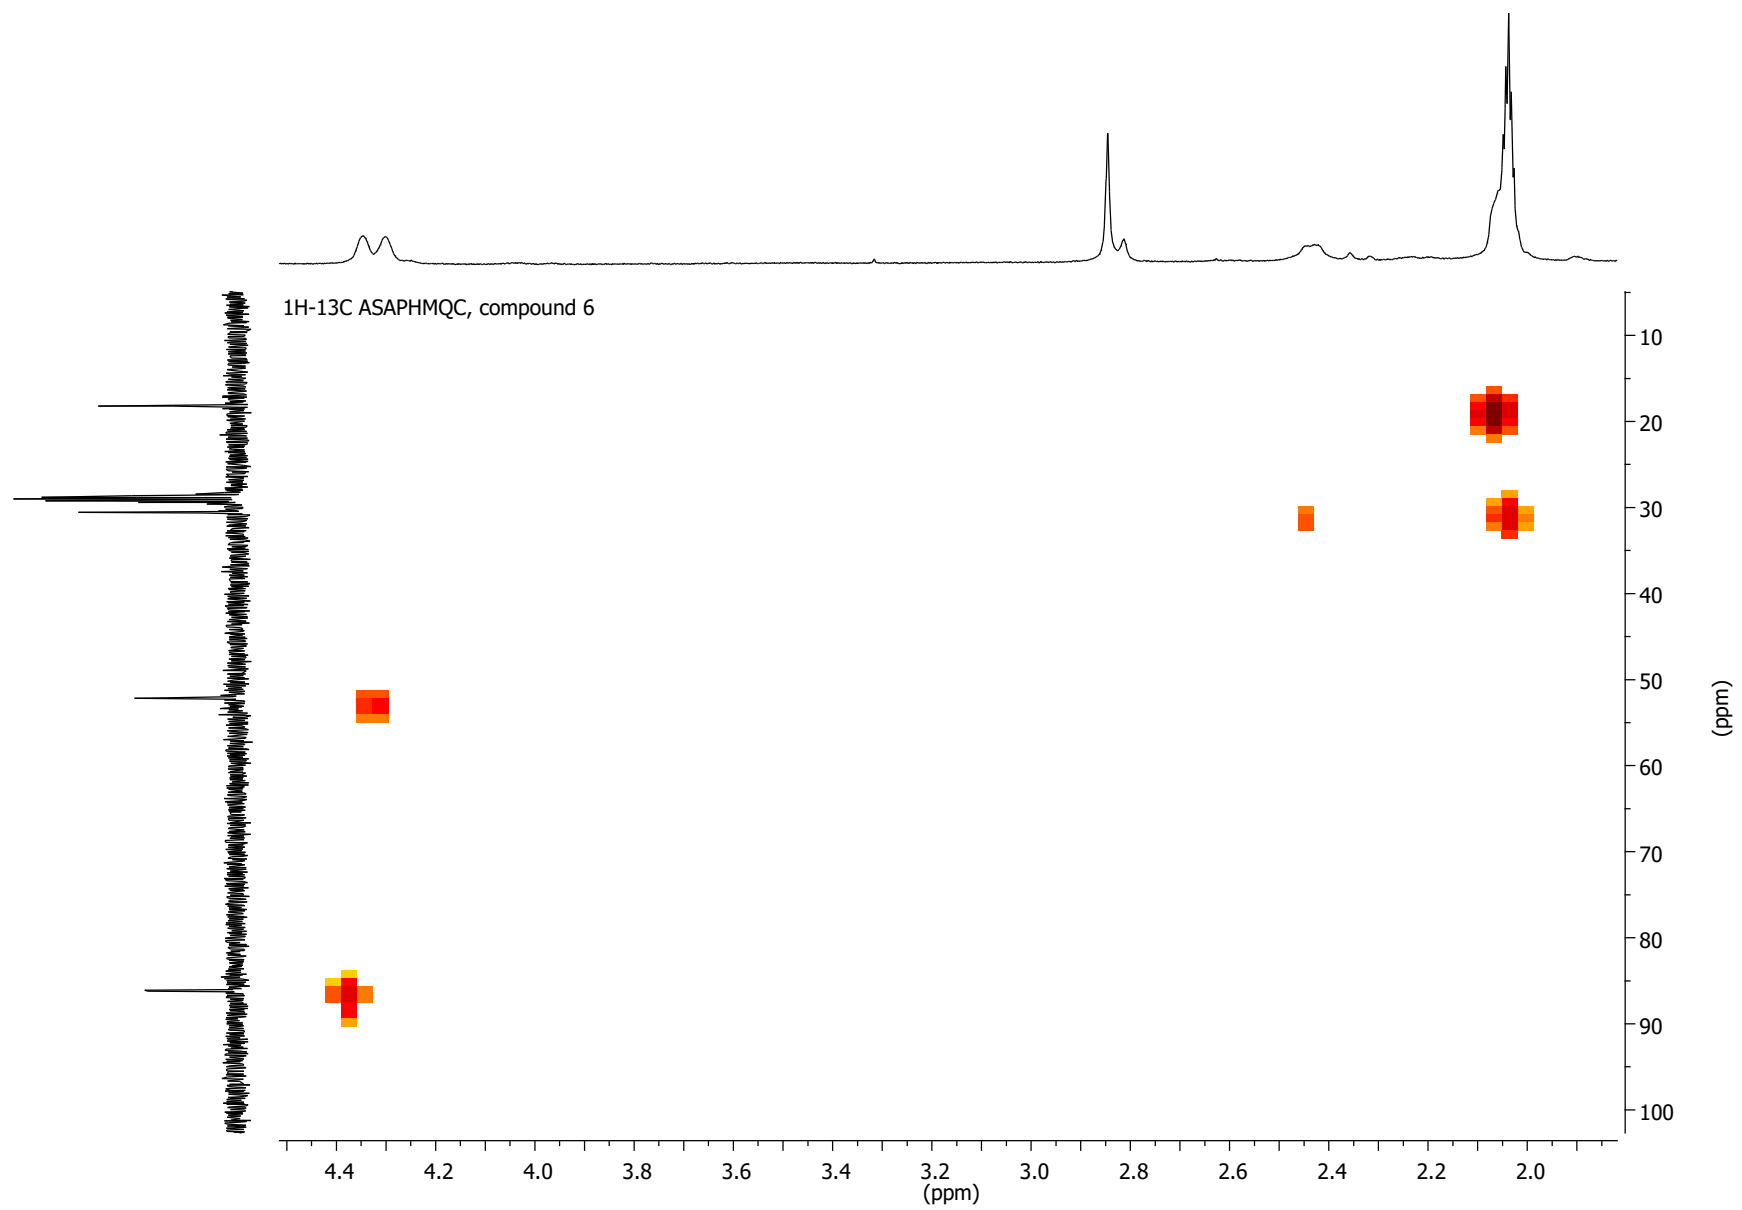

$^1\text{H}$ , compound 8

— 130.13

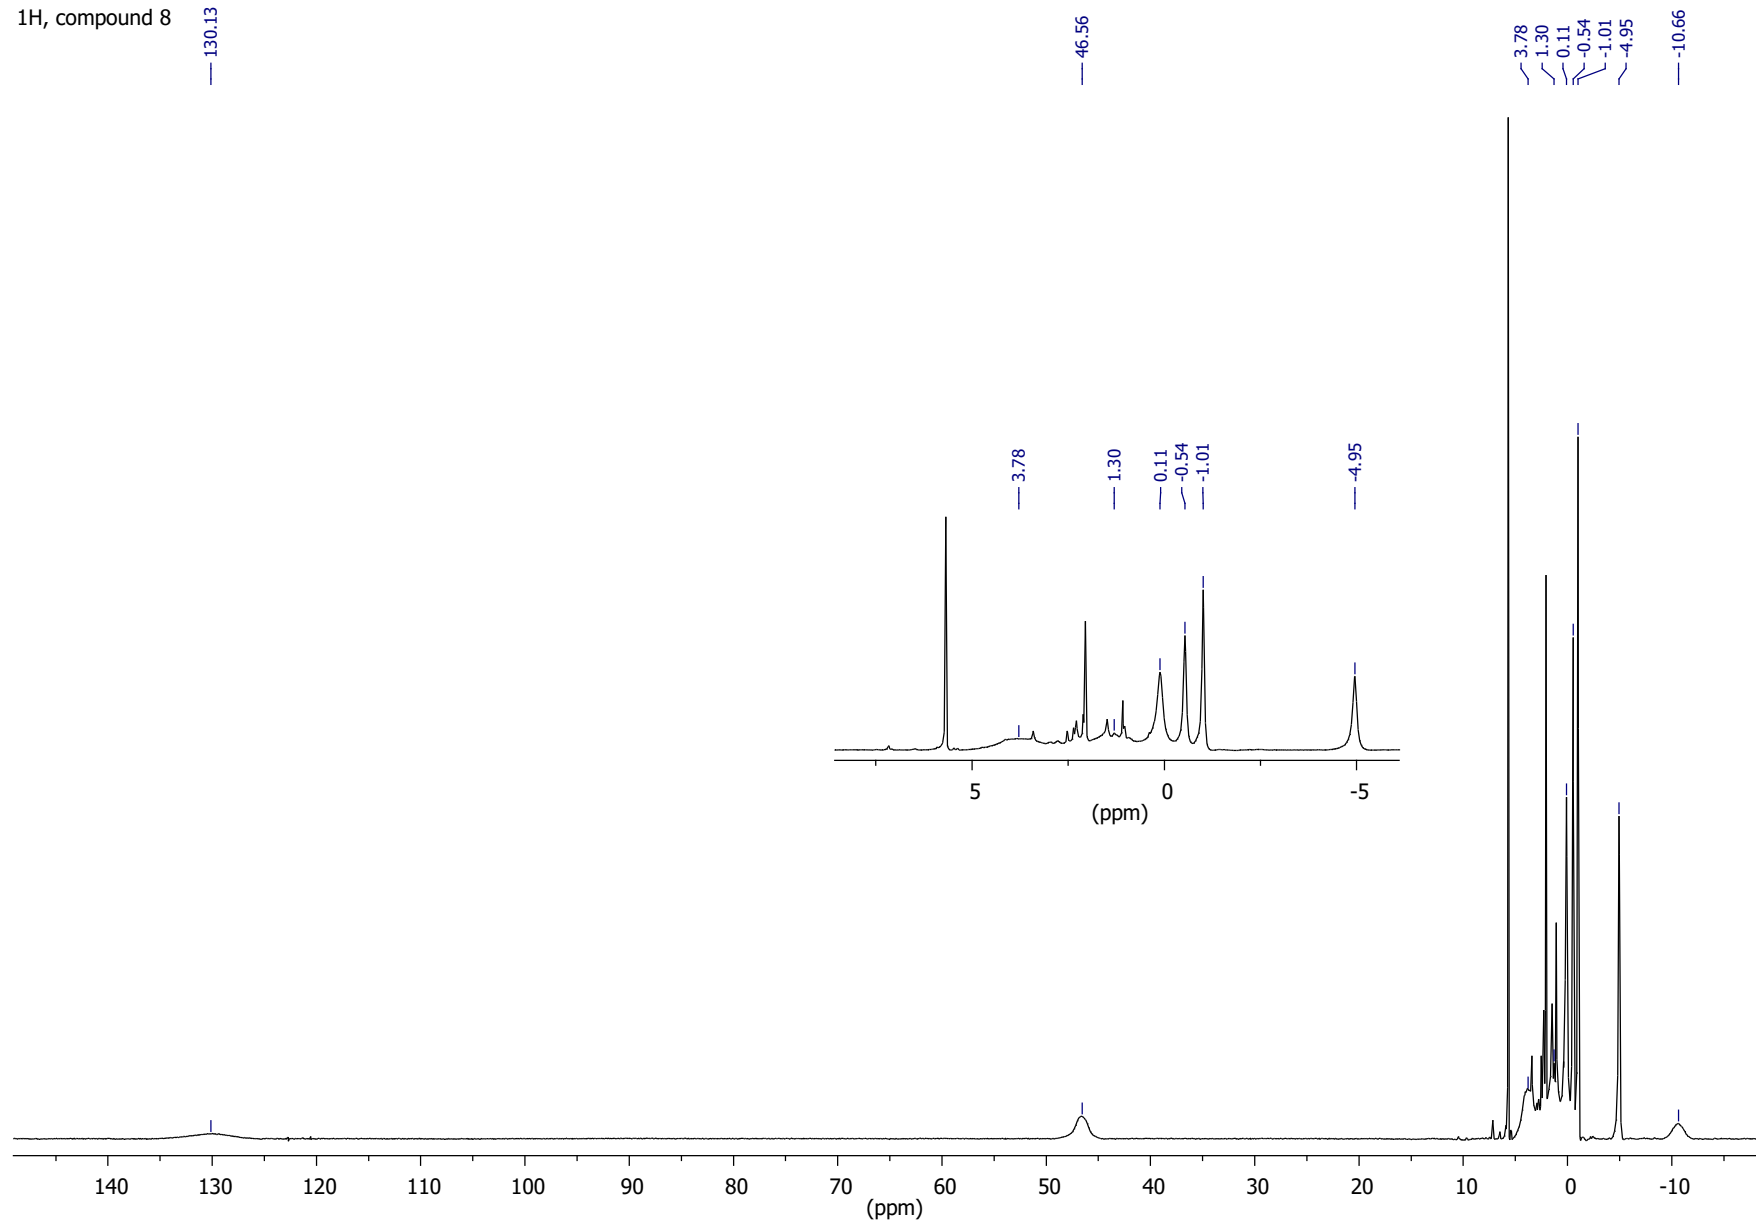

$^{11}\text{B}\{^1\text{H}\}$ ,  
compound 8

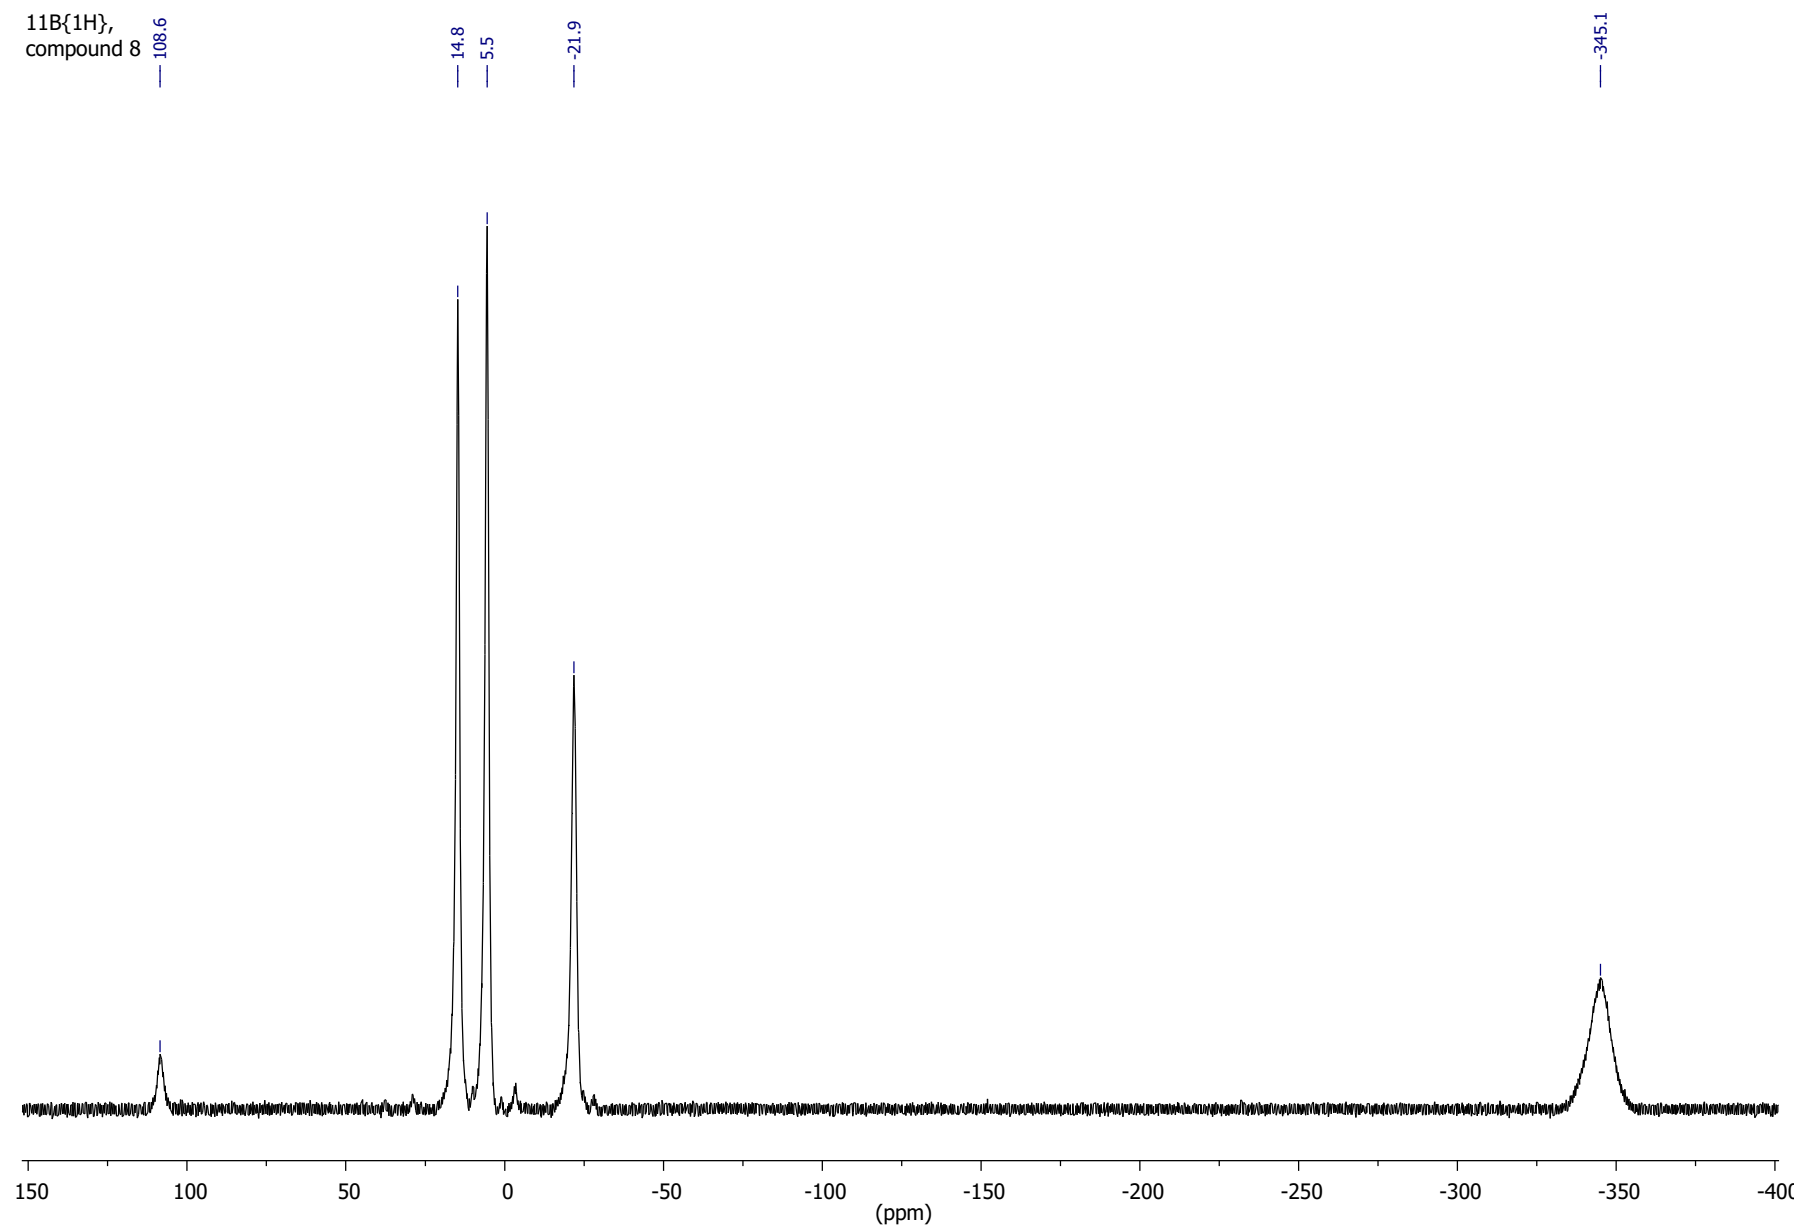

<sup>11</sup>B,  
compound 8

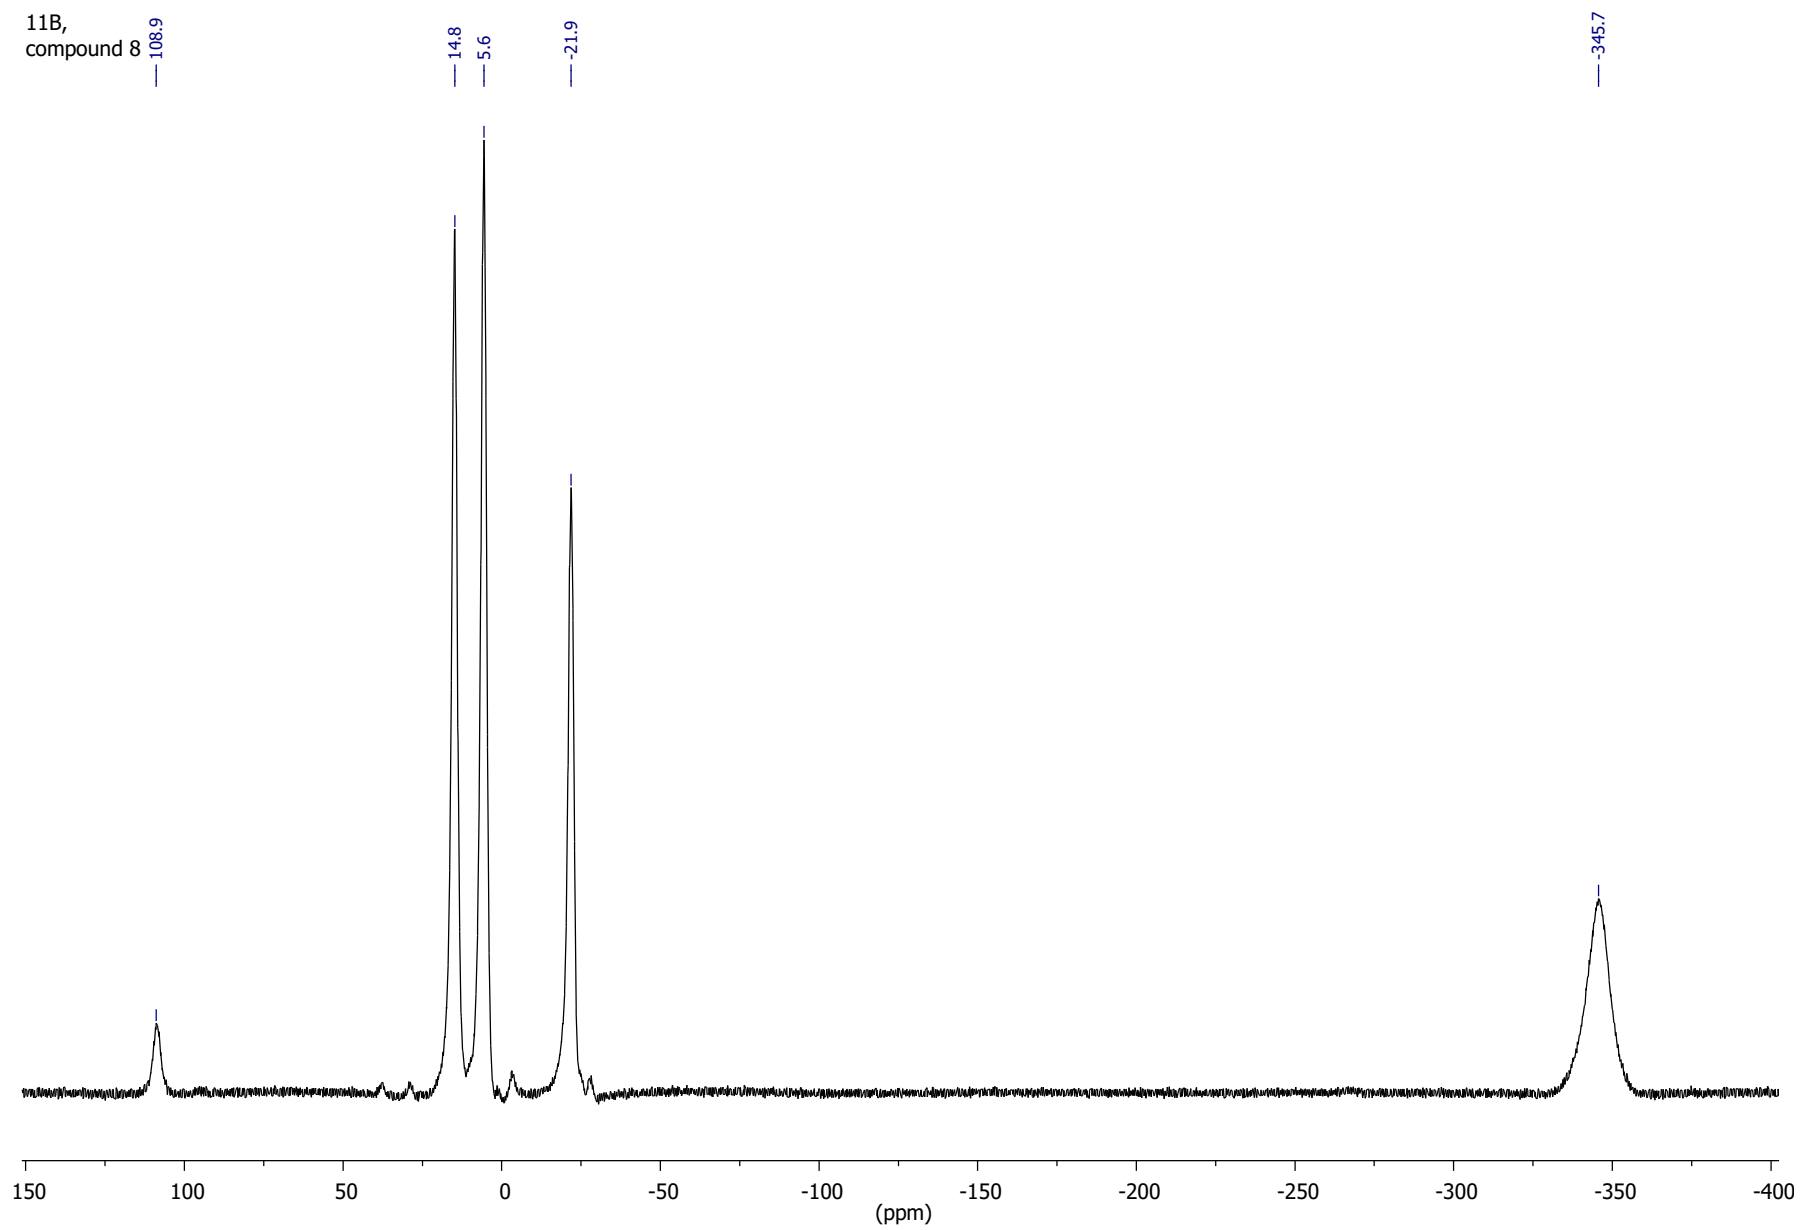



$^{13}\text{C}\{^1\text{H}\}$ , compound 8

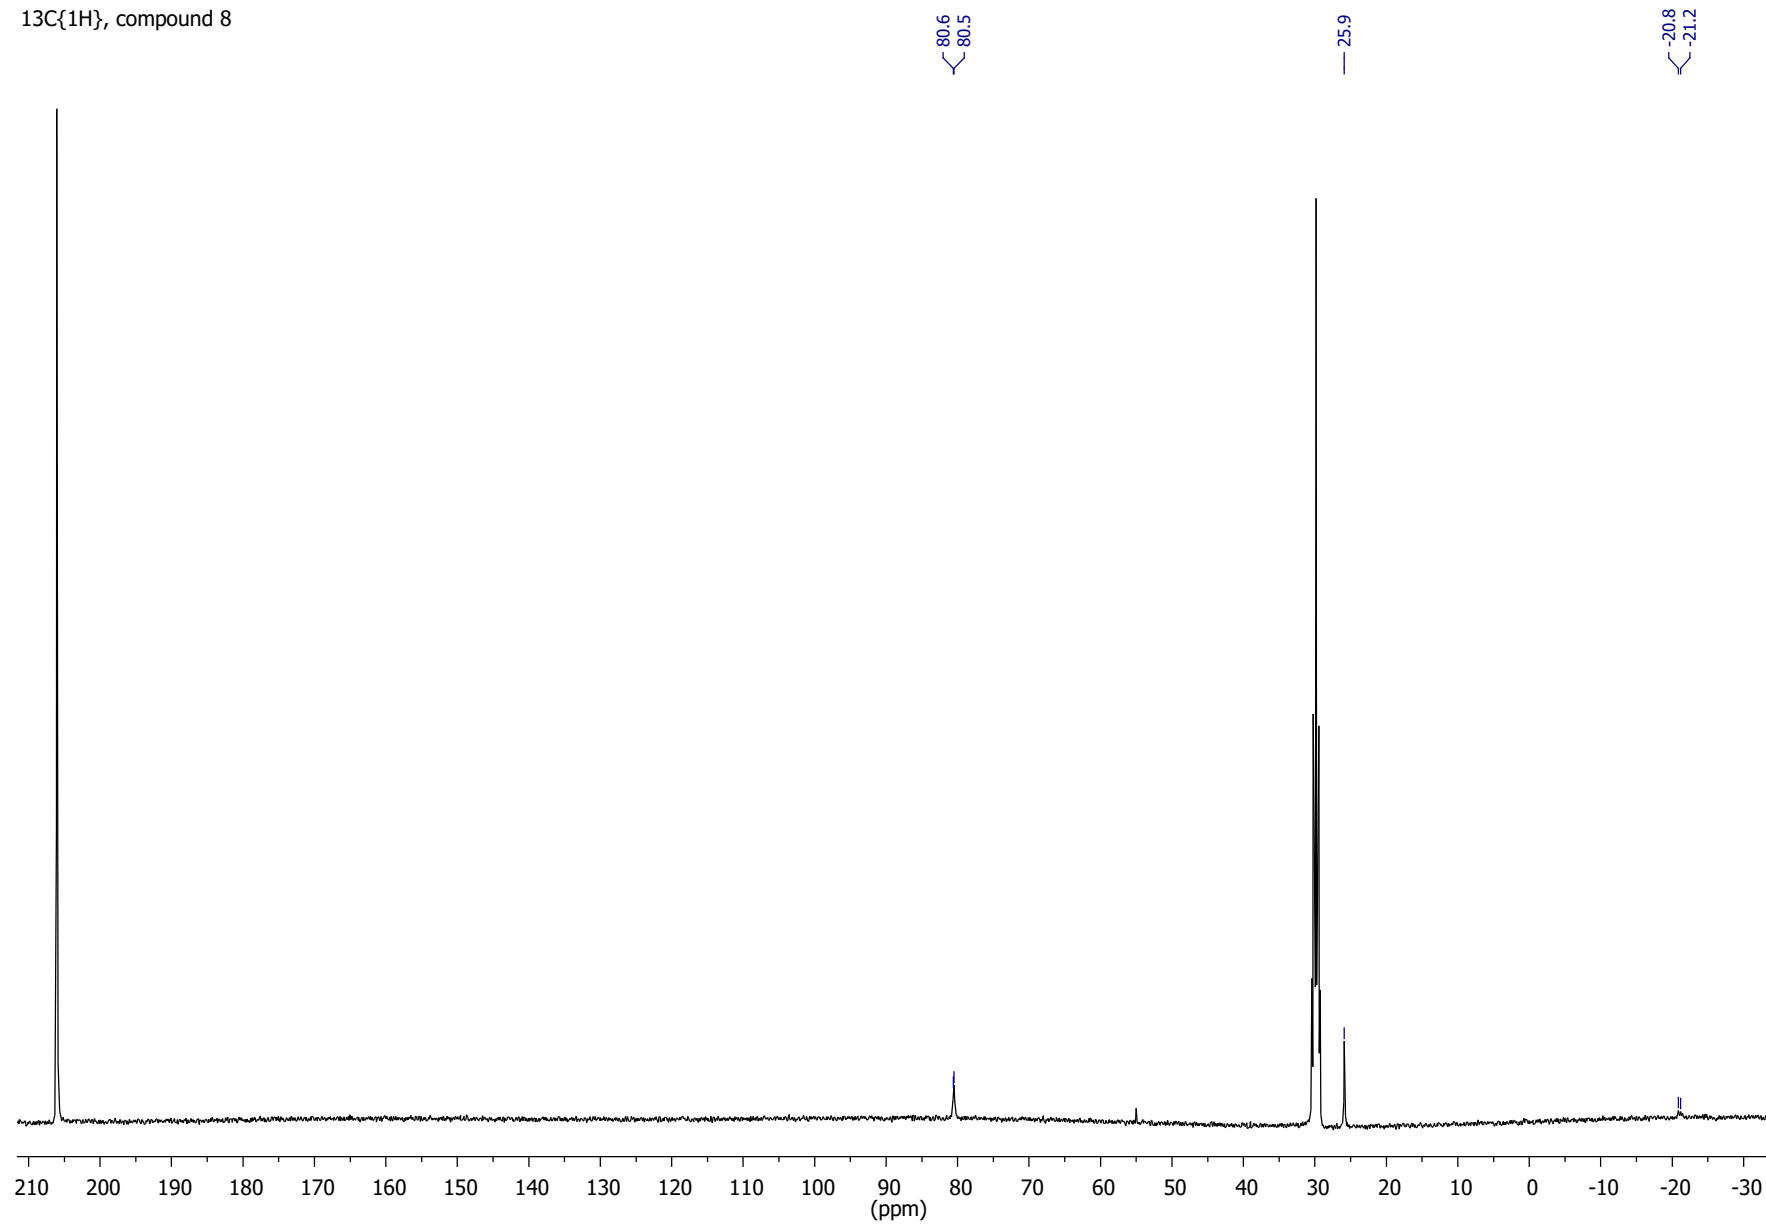

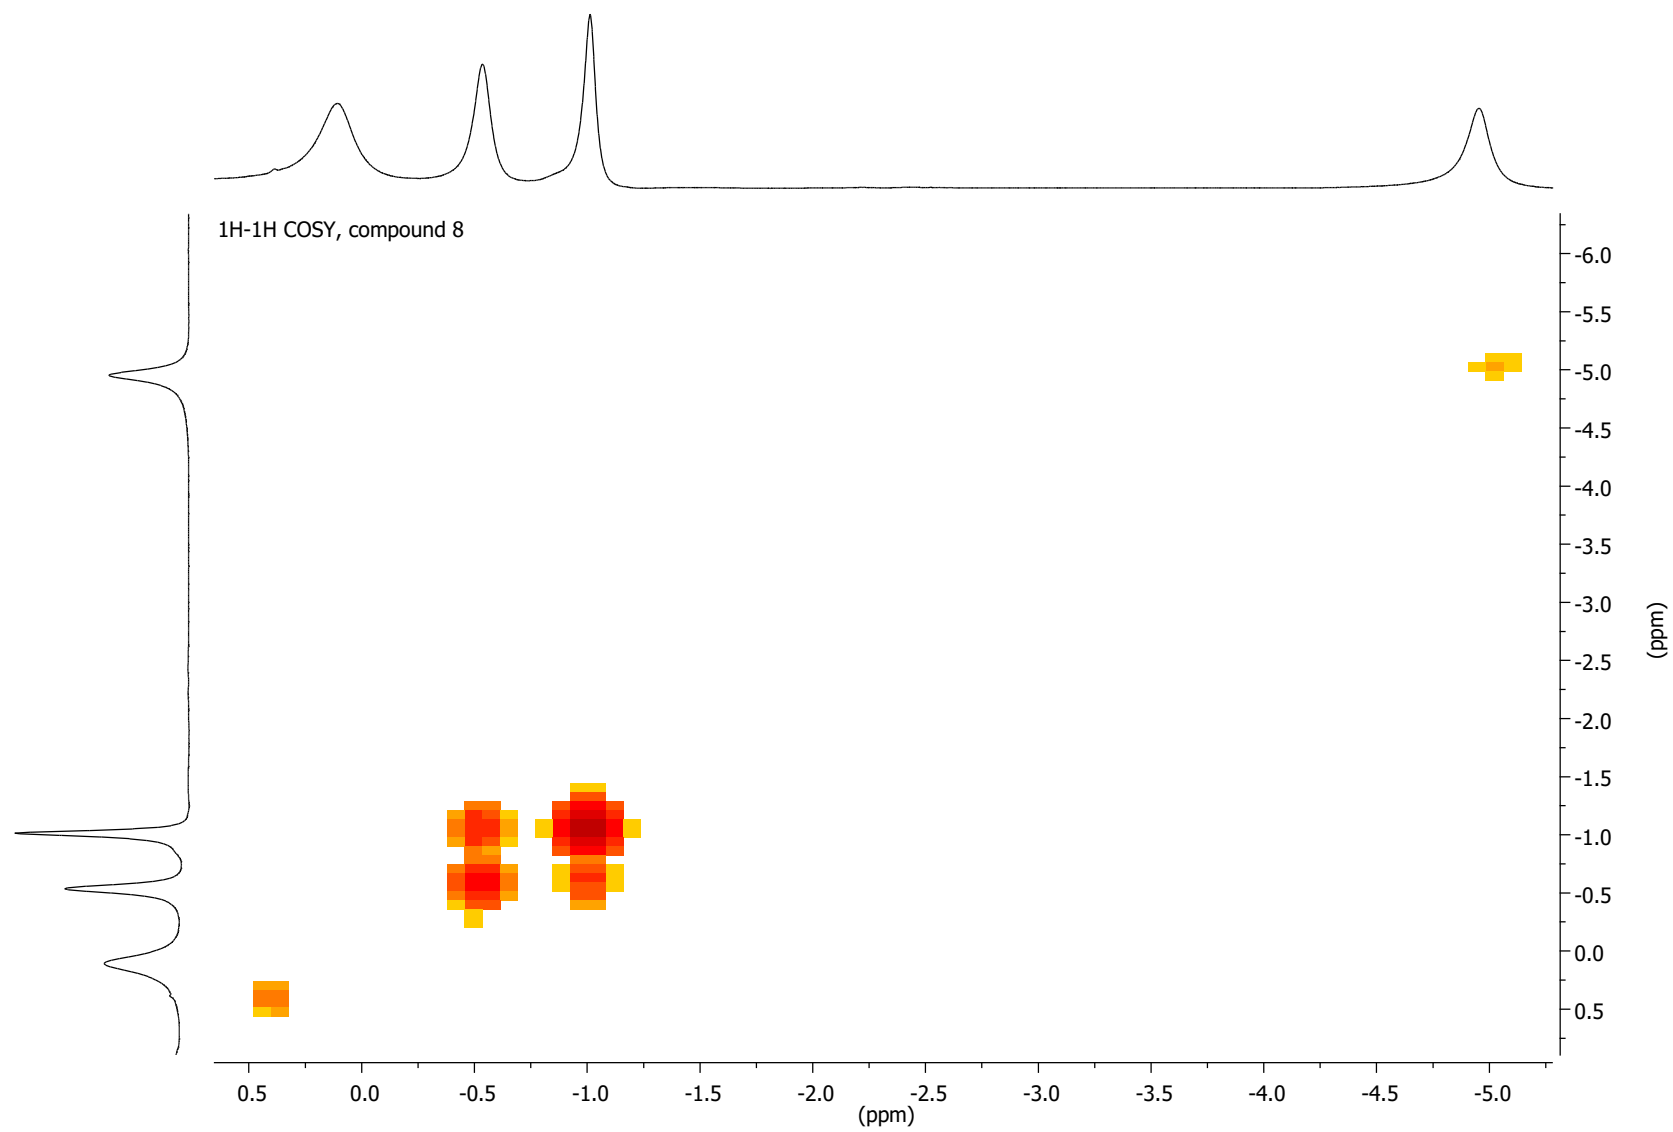

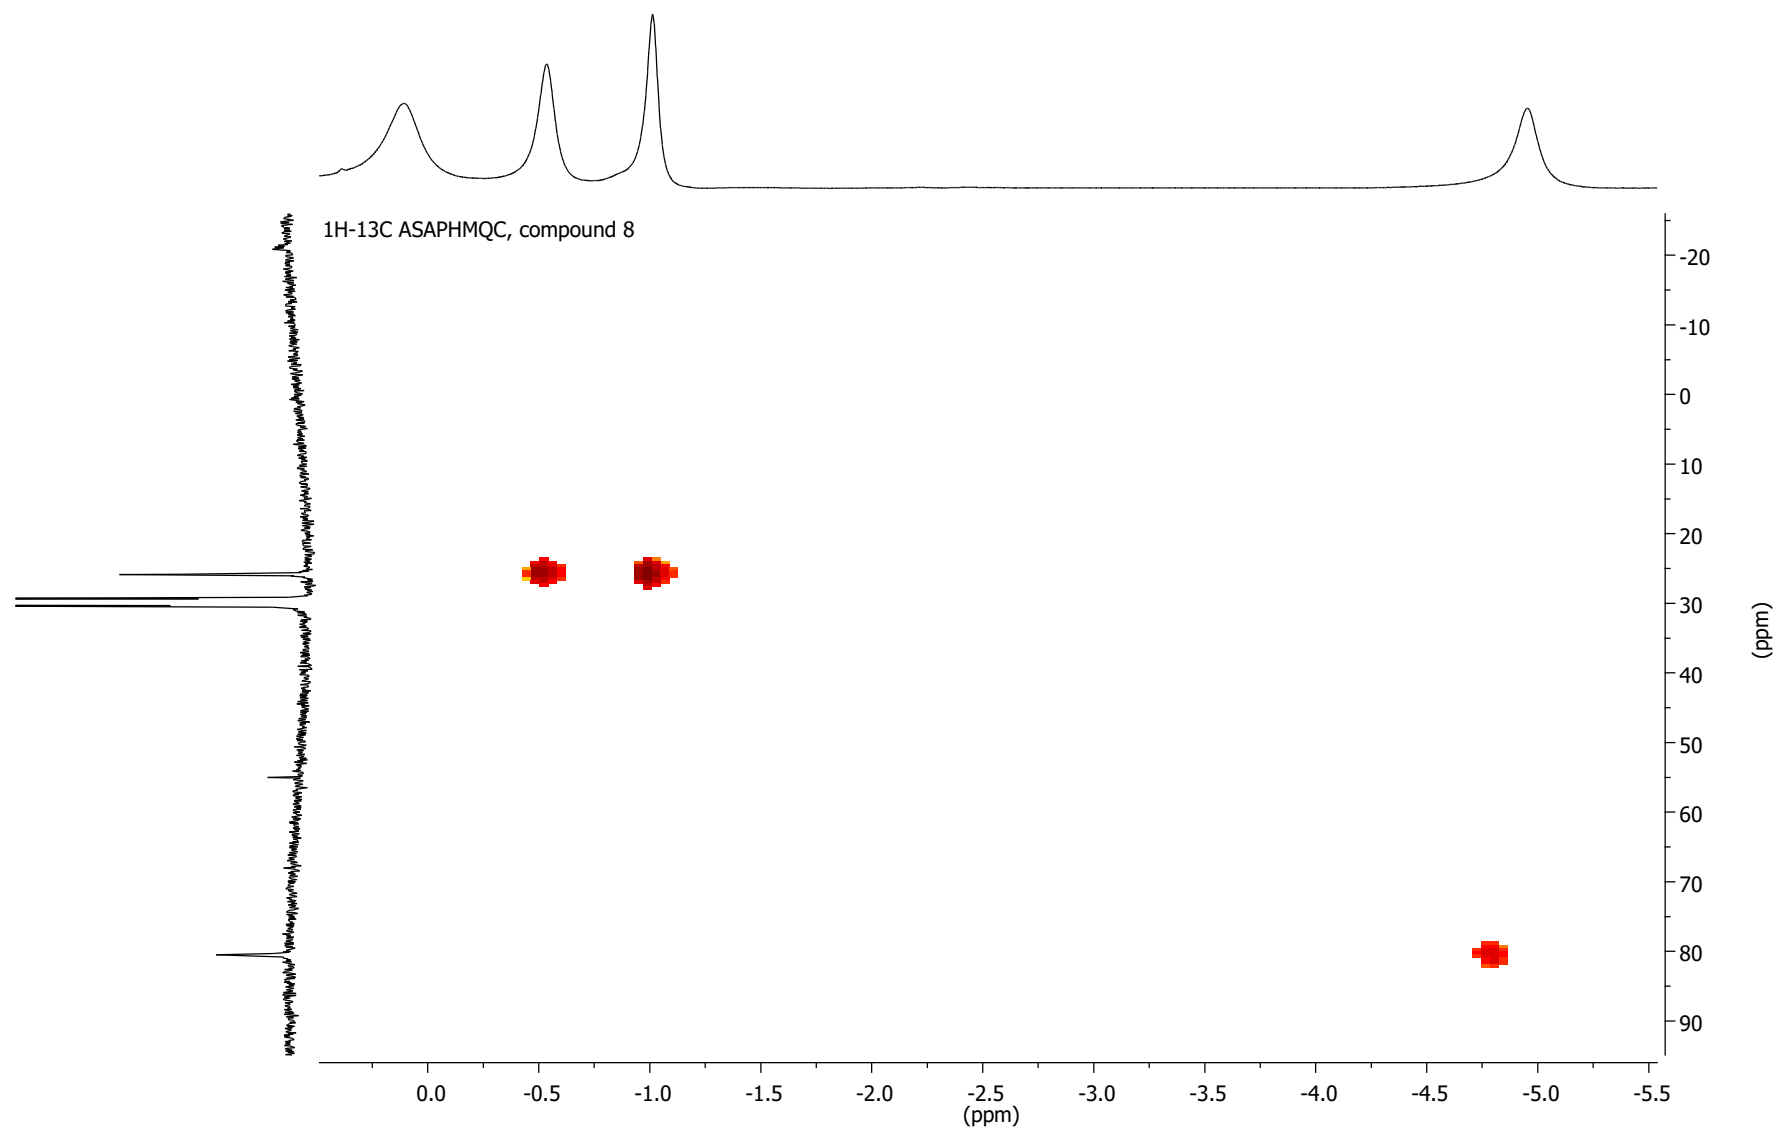

Supplement: s1 [file s1]
